# Supplementary material
Source: PubMed Central journal article supplement (PMC8963176)
Supplement: NIHMS1738861-supplement-SI.pdf [file NIHMS1738861-supplement-SI.pdf]

## Supporting Information

### Cell-Free Total Biosynthesis of Plant Terpene Natural Products using an Orthogonal Cofactor Regeneration System

Undramaa Bat-Erdene,<sup>1‡</sup> John M. Billingsley,<sup>1,2‡</sup> William C. Turner,<sup>1,3</sup> Benjamin R. Lichman,<sup>4</sup> Francesca Ippoliti,<sup>5</sup> Neil K. Garg,<sup>5</sup> Sarah E. O'Connor,<sup>6</sup> and Yi Tang<sup>1,5\*</sup>

<sup>1</sup> Department of Chemical and Biomolecular Engineering, University of California, Los Angeles, Los Angeles, CA, 90095, USA

<sup>2</sup> Invizyne Technologies, Inc., Monrovia, CA, 91016-3412, USA

<sup>3</sup> Department of Chemical and Biological Engineering, Northwestern University, Evanston, IL, 60208, USA

<sup>4</sup> Department of Biology, Centre for Agricultural Products, University of York, Wentworth Way York, YO10 5DD, UK

<sup>5</sup> Department of Chemistry and Biochemistry, University of California, Los Angeles, Los Angeles, CA, 90095, USA

<sup>6</sup> Department of Natural Product Biosynthesis, Max Planck Institute for Chemical Ecology, Hans-Knöll-Straße 8, 07745 Jena, Germany

\* Corresponding author. \*Email: yitang@ucla.edu.

‡These authors contributed equally.

## Table of Contents

---

|                                                                                                                                      |    |
|--------------------------------------------------------------------------------------------------------------------------------------|----|
| <b>1. Materials and Methods</b> .....                                                                                                | 3  |
| 1.1. Strains and general culture conditions .....                                                                                    | 3  |
| 1.2. General synthesis conditions .....                                                                                              | 3  |
| 1.3. DNA manipulations and cloning .....                                                                                             | 3  |
| 1.4. Protein expression and purification from <i>Escherichia coli</i> .....                                                          | 3  |
| 1.5. Synthesis of 8-hydroxygeraniol (2) .....                                                                                        | 4  |
| 1.6. Synthesis of 8-oxogeraniol (4) .....                                                                                            | 5  |
| 1.7. Synthesis of 8-oxogeraniol (5) .....                                                                                            | 6  |
| 1.8. Small-scale <i>in vitro</i> enzymatic reactions .....                                                                           | 6  |
| 1.9. 10 mL-scale nepetalactol and nepetalactone production and purification .....                                                    | 7  |
| <b>2. Supporting Tables</b> .....                                                                                                    | 9  |
| <b>Table S1.</b> Primers used in this study .....                                                                                    | 9  |
| <b>Table S2.</b> Gene sequences used in this study .....                                                                             | 10 |
| <b>Table S3.</b> Plasmids used in this study .....                                                                                   | 14 |
| <b>Table S4.</b> Cost analysis .....                                                                                                 | 15 |
| <b>3. Supporting Figures</b> .....                                                                                                   | 16 |
| <b>Figure S1.</b> SDS-PAGE analysis of purified enzymes.....                                                                         | 16 |
| <b>Figure S2.</b> GC/MS analysis of geraniol hydroxylation activity of TfG8H .....                                                   | 17 |
| <b>Figure S3.</b> GC/MS analysis of 8-hydroxygeraniol oxidation by GOR .....                                                         | 18 |
| <b>Figure S4.</b> GC/MS analysis of 8-oxogeraniol reduction cyclization by ISY/NmMLPL .....                                          | 19 |
| <b>Figure S5.</b> Cofactor regeneration systems.....                                                                                 | 20 |
| <b>Figure S6.</b> GC/MS analysis of 8-hydroxygeraniol oxidation with GOR with NAD <sup>+</sup> regeneration ..                       | 21 |
| <b>Figure S7.</b> Time-course of 8-hydroxygeraniol oxidation with GOR with NAD <sup>+</sup> regeneration .....                       | 22 |
| <b>Figure S8.</b> Geraniol hydroxylation by TfG8H with NADPH regeneration .....                                                      | 23 |
| <b>Figure S9.</b> Time-course of geraniol hydroxylation by TfG8H with NADPH regeneration .....                                       | 24 |
| <b>Figure S10.</b> Geraniol hydroxylation by TfG8H with NADPH regeneration with pyruvate .....                                       | 25 |
| <b>Figure S11.</b> 8-oxogeraniol reduction/cyclization by ISY/NmMLPL with NADPH regeneration ..                                      | 26 |
| <b>Figure S12.</b> 8-oxogeraniol reduction and cyclization by ISY/MLPL with NADPH regeneration with additional pyruvate .....        | 27 |
| <b>Figure S13.</b> Small-scale one-pot one-step bioconversion of geraniol to nepetalactol .....                                      | 28 |
| <b>Figure S14.</b> Small-scale one-pot two-step geraniol to nepetalactol conversion .....                                            | 29 |
| <b>Figure S15.</b> 10 mL-scale one-pot two-step geraniol to nepetalactol conversion .....                                            | 30 |
| <b>Figure S16.</b> 10 mL-scale one-pot drop-in geraniol to nepetalactol conversion .....                                             | 31 |
| <b>Figure S17.</b> GC-MS chromatograms for 10 mL-scale one-pot conversion of 6.2 mM geraniol to nepetalactol and nepetalactone ..... | 32 |
| <b>Figure S18.</b> Geraniol calibration curve .....                                                                                  | 33 |
| <b>Figure S19.</b> 8-hydroxygeraniol calibration curve .....                                                                         | 34 |
| <b>Figure S20.</b> 8-oxogeraniol calibration curve .....                                                                             | 35 |
| <b>Figure S21.</b> Nepetalactol calibration curve .....                                                                              | 36 |
| <b>Figure S22.</b> Nepetalactone calibration curve .....                                                                             | 37 |
| <b>4. Supplemental References</b> .....                                                                                              | 38 |

## Materials and Methods

### 1.1 Strains and general culture conditions

*E. coli* TOP10 and *E. coli* BL21(DE3) strains were used for cloning and protein expression, respectively. All *E. coli* strains were cultured in LB media at 37°C for cloning and 16°C for protein expression.

### 1.2 General synthesis conditions

Unless stated otherwise, reactions were conducted in flame-dried glassware under an atmosphere of nitrogen using anhydrous solvents (passed through activated alumina columns). All commercially obtained reagents were used as received. Geranyl acetate and potassium carbonate were purchased from Alfa Aesar. Selenium dioxide and *tert*-Butyl hydroperoxide solution (~5.5 M in decane, over 4Å molecular sieves) were obtained from Sigma Aldrich. Dess-Martin periodinane (DMP) was purchased from Combi-Blocks. Reaction temperatures were controlled using an IKA Mag temperature modulator, and unless stated otherwise, reactions were performed at 23 °C. Thin-layer chromatography (TLC) was conducted with EMD gel 60 F254 pre-coated plates (0.25 mm) and visualized using anisaldehyde staining. Silicycle Siliaflash P60 (particle size 0.040–0.063 mm) was used for flash column chromatography.

### 1.3 DNA manipulations and cloning

All DNA manipulations in this study were conducted according to manufacturers' protocols. DNA restriction enzymes were used as recommended by the manufacturer (New England Biolabs, NEB). PCR was performed according to recommended protocol using Q5<sup>®</sup> High-Fidelity DNA polymerase (NEB). The primers used in this study are listed in Table S1. Plasmid DNAs were confirmed by restriction enzyme digestion checks and sequencing.

The genes for TfG8H, YkuN, and MLPL were synthesized by IDT technologies. They were then cloned into pCR-blunt vector by ligation and transformed into *E. coli* TOP10 strain for storage. The genes were then amplified by using their respective primers listed in Table S1, digested with restriction enzymes NdeI and XhoI and ligated into pET28a vector linearized by NdeI and XhoI with T4 ligase (Invitrogen). The genes for GOR, ISY and NEPS1 were amplified from plasmids pJB042, pJB043 and pJB193, respectively, which were built in a previous study<sup>1</sup> with their respective primers listed in Table S1, and inserted into pET28a vector with digestion/ligation. The genes for FpR, FumC and MaeB were amplified from *E. coli* genomic DNA by PCR with their respective primers listed in Table S1 and inserted into pET28a vector as previously described, with HindIII being used in place of XhoI in FumC and NheI being used in place of NdeI in MaeB cloning. The primers were designed to give the proteins a hexa-His tag on their *N*-termini. The resultant plasmids were sequenced for verification and listed in Table S2. The plasmid encoding C-terminally hexa-His-tagged NoxE (pEUB50010) was obtained from Prof. James Bowie lab at UCLA Chemistry and Biochemistry. The full-length TfG8H plasmid (pEUB50001) was built by complementing the missing amino acids with a primer encoding appropriate overhang sequence. The resulting PCR product was inserted into pET28a as described above.

### 1.4 Protein expression and purification from *E. coli* BL21(DE3)

The plasmids listed in Table S3 were transformed into *E. coli* BL21(DE3) individually and the transformants were grown overnight in 5 mL of LB medium with 50 µg/mL kanamycin at 37°C. The overnight cultures were used as seed cultures for 1 L fresh LB media containing 50 µg/mL

kanamycin and incubated at 37°C until the OD<sub>600</sub> reached 0.6. The cultures were cooled on ice, before the protein overexpression was induced with 0.1 mM isopropyl-β-D-thiogalactopyranoside (IPTG, GoldBio, USA) at 16°C overnight. Cultures were supplemented with 125 μM FeSO<sub>4</sub> for iron-containing enzymes and 80 mg/L 5'-aminolevulinic acid for P450 expression. The *E. coli* cells were harvested by centrifugation at 5300 rpm for 15 min and the cell pellets were stored at -80°C for later use. All transformants except for transformant harboring pEUB50006 were resuspended in 30 mL A10 buffer (50 mM Tris-HCl, 100 mM NaCl, 10 mM imidazole, pH 8.0) containing 1 tablet of Pierce™ protease inhibitor (Thermo Scientific). The cell suspension was lysed on ice by sonication and the lysate was centrifuged at 17,000 g for 15 min at 4°C to remove the insoluble cellular debris. The recombinant C- or N- terminally hexa-His-tagged proteins were purified individually from corresponding soluble fractions by affinity chromatography with Ni-NTA agarose resin (Qiagen) according to the manufacturer's instructions. The purified proteins were concentrated and exchanged into storage buffer (50 mM Phosphate buffer, 100 mM NaCl, 10% glycerol, pH 8.0) with Centriprep filters (Amicon). SDS-PAGE was performed to check the protein purity and Bradford Protein Assay (Bio-Rad) was used to calculate protein concentration with bovine serum albumin (BSA, Sigma-Aldrich) as standard. The proteins were aliquoted and stored at -80°C until used in *in vitro* assays.

The cell pellet harboring pEUB50006 was resuspended in 30 mL MOPS10 buffer (50 mM MOPS, 100 mM NaCl, 10 mM imidazole, 1% Triton-X100, pH 7.5) containing 1 tablet of Pierce™ protease inhibitor (Thermo Scientific). The cell suspension was lysed on ice by sonication and the lysate was centrifuged at 17,000 g for 15 min at 4°C to remove the insoluble cellular debris. The recombinant C- terminally hexa-His-tagged protein was purified from corresponding soluble fractions by affinity chromatography with Ni-NTA agarose resin (Qiagen) according to the manufacturer's instructions. The purified protein was buffer exchanged into MOPS10 buffer with 10% glycerol with cellulose membrane. SDS-PAGE was performed to check the protein purity and Bradford Protein Assay (Bio-Rad) was used to calculate protein concentration with bovine serum albumin (BSA, Sigma-Aldrich) as standard. The protein was aliquoted and stored at -80°C until used in *in vitro* assays.

### 1.5 Synthesis of 8-hydroxygeraniol (2)

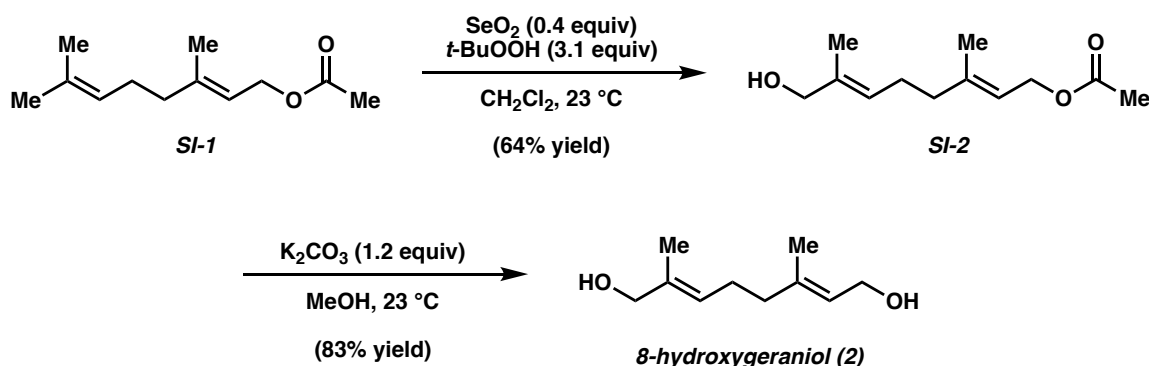

**8-Hydroxygeranyl acetate (SI-2):** To a flame-dried 100-mL round bottom flask equipped with a magnetic stir bar and selenium dioxide (226 mg, 2.04 mmol, 0.400 equiv) under N<sub>2</sub> was added CH<sub>2</sub>Cl<sub>2</sub> (25 mL, 0.20 M), *tert*-butyl hydroperoxide (5.5 M in decane, 2.9 mL, 16 mmol, 3.1 equiv), and geranyl acetate (SI-1, 1.09 mL, 5.09 mmol, 1.00 equiv). After stirring for 1.5 h at 23 °C, the reaction mixture was concentrated under reduced pressure. The crude oil was transferred to a separatory funnel with EtOAc (50 mL). The organic layer was washed successively with deionized water (2 x 20 mL), saturated aqueous NaHCO<sub>3</sub> (1 x 20 mL), deionized water (1 x 10 mL),



and brine (1 x 10 mL). The combined aqueous layers were extracted with EtOAc (1 x 80 mL). The combined organic layers were dried over Na<sub>2</sub>SO<sub>4</sub>, filtered, and concentrated under reduced pressure. The resulting crude oil was purified via flash chromatography (6:1 → 2:1 hexanes:EtOAc) to afford 8-hydroxygeranyl acetate (SI-2, 688 mg, 64% yield) as a colorless oil. <sup>1</sup>H-NMR spectral data match those previously reported.<sup>2</sup>

**8-Hydroxygeraniol (2):** A flame-dried 50-mL round bottom flask equipped with a magnetic stir bar was charged with 8-hydroxygeranyl acetate (SI-2, 633 mg, 2.98 mmol, 1.00 equiv) and methanol (19 mL, 0.16 M). Potassium carbonate (495 mg, 3.58 mmol, 1.20 equiv) was added in one portion. After stirring at 23 °C for 2.5 h, the solvent was removed under reduced pressure, and the reaction mixture was transferred to a separatory funnel with deionized water (10 mL). The aqueous layer was extracted with diethyl ether (3 x 20 mL). The combined organic layers were washed successively with 0.5 M aqueous HCl (1 x 10 mL), saturated aqueous NaHCO<sub>3</sub> (1 x 10 mL), brine (1 x 10 mL) and deionized water (1 x 10 mL). Next, the organic layers were dried over MgSO<sub>4</sub>, filtered, and concentrated under reduced pressure. The resulting crude oil was purified via flash chromatography (1:1 hexanes:EtOAc) to afford 8-hydroxygeraniol (2, 490 mg, 83% yield) as a light yellow oil. <sup>1</sup>H-NMR spectral data match those previously reported.<sup>2</sup>

### 1.6 Synthesis of 8-oxogeraniol (4)

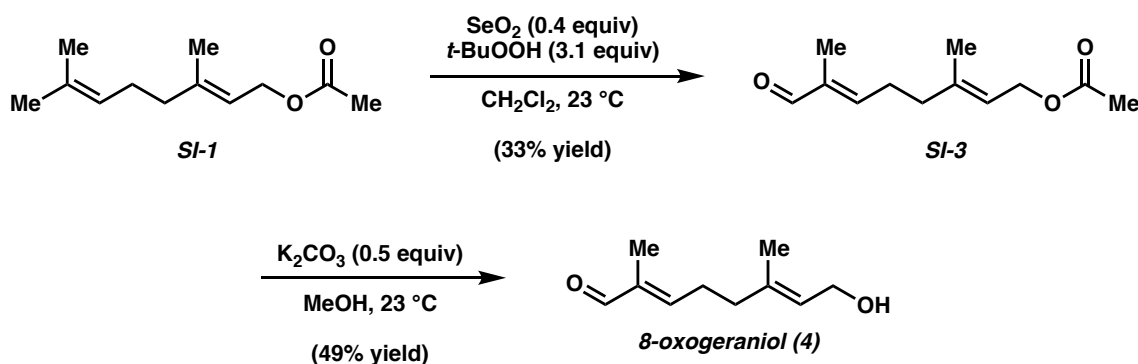

**8-Oxogeranyl acetate (SI-3):** A 500 mL round bottom flask was equipped with a magnetic stir bar and flame-dried then cooled under N<sub>2</sub>. Selenium dioxide (1.36 g, 12.2 mmol, 0.400 equiv), CH<sub>2</sub>Cl<sub>2</sub> (150 mL, 0.20 M), *tert*-butyl hydroperoxide (5.5 M in decane, 17 mL, 95 mmol, 3.1 equiv), and geranyl acetate (SI-1, 6.55 mL, 30.6 mmol, 1.00 equiv) were added to the flask. After stirring for 21 h at 23 °C, the reaction mixture was concentrated to an oil under reduced pressure. To the crude oil, EtOAc (100 mL) was added and the reaction was transferred to a separatory funnel. The organic layer was washed successively with deionized water (2 x 20 mL), saturated aqueous NaHCO<sub>3</sub> (1 x 20 mL), deionized water (1 x 20 mL), and brine (1 x 20 mL). The combined aqueous layers were extracted with EtOAc (100 mL). The combined organic layers were dried over MgSO<sub>4</sub>, filtered, and concentrated under reduced pressure. The crude oil was purified via flash chromatography (6:1 hexanes:EtOAc) to afford 8-oxogeranyl acetate (SI-3, 2.14 g, 33% yield) as a colorless oil. <sup>1</sup>H-NMR spectral data match those previously reported.<sup>3</sup>

**8-Oxogeraniol (4):** To a flame-dried 25 mL round bottom flask charged with a stir bar and cooled under N<sub>2</sub>, 8-oxogeranyl acetate (SI-3, 309 mg, 1.47 mmol, 1.00 equiv) was dissolved in methanol (9.2 mL, 0.16 M). To the stirring solution was added potassium carbonate (102 mg, 0.736 mmol, 0.500 equiv) and the solution was stirred at 23 °C for 2.5 h. After 2.5 h, the solvent was removed under reduced pressure, deionized water (10 mL) and diethyl ether (10 mL) were

added to the crude oil, and the reaction was transferred to a separatory funnel. The layers were separated and the aqueous layer was extracted with diethyl ether (3 x 10 mL). The combined organic layers were washed with brine (1 x 10 mL). The organic layers were then dried over Na<sub>2</sub>SO<sub>4</sub>, filtered, and concentrated under reduced pressure. The crude oil was purified by flash chromatography (2:1 hexanes:EtOAc) to afford 8-oxogeraniol (**4**, 122 mg, 49% yield) as a light yellow oil. <sup>1</sup>H-NMR spectral data match those previously reported.<sup>3</sup>

### 1.7 Synthesis of 8-oxogeraniol (**5**)

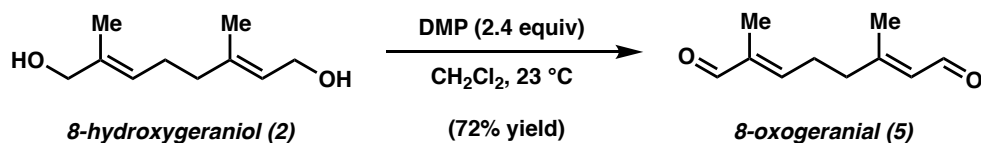

**8-Oxogeraniol (5):** To a flame-dried 250 mL round bottom flask equipped with a stir bar and cooled under N<sub>2</sub>, 8-hydroxygeraniol (**2**, 1.00 g, 5.87 mmol, 1.00 equiv), DMP (5.98 g, 14.1 mmol, 2.40 equiv), and CH<sub>2</sub>Cl<sub>2</sub> (59 mL, 0.10 M) were added. The flask was purged with N<sub>2</sub> and stirred at 23 °C for 1 h. After 1 h, the reaction was quenched with 1:1:1 sat. aq. NaHCO<sub>3</sub>:sat. aq. Na<sub>2</sub>S<sub>2</sub>O<sub>3</sub>:H<sub>2</sub>O (60 mL) and was transferred to a separatory funnel. The aqueous layer was extracted with CH<sub>2</sub>Cl<sub>2</sub> (3 x 60 mL). The combined organic layers were dried over Mg<sub>2</sub>SO<sub>4</sub>, filtered, and concentrated in vacuo. The crude residue was purified via flash chromatography (4:1 Hex:EtOAc) to afford 8-oxogeraniol (**5**, 705 mg, 72% yield) as a light yellow oil. <sup>1</sup>H-NMR spectral data match those previously reported.<sup>3</sup>

## 1.8 Small-scale *in vitro* enzymatic reactions

### 1.8.1 TfG8H *in vitro* assays

200 μL-scale *in vitro* assays were performed at 30°C for 2 hours in 100 mM Bis-Tris-Propane buffer (pH 9.0, unless otherwise indicated) generally containing 2 mM geraniol, 5 μM TfG8H, 10 μM FpR, 10 μM YkuN and 4 mM NADPH, unless otherwise indicated. Reactions with NADPH regeneration contain an additional 6 mM fumarate, 1 μM FumC and 10 μM MaeB. The reaction was stopped by extracting directly with 100 μL ethyl acetate (EtoAc) and centrifuged at 17,000 *g* for 5 min before the organic layer was subjected to GC/MS analysis on an Agilent Technologies GC-MS 6890/5973 equipped with a DB-FFAP column. An inlet temperature of 220 °C and constant pressure of 4.2 psi were used. The oven temperature was held at 60 °C for 5 min and then ramped at 60°C/min for 1.5 min, followed by a ramp of 15 °C/min for 16 min and a hold for 10 min.

### 1.8.2 GOR *in vitro* assays

200 μL-scale *in vitro* assays were performed at 30°C for 2 hours in 100 mM Bis-Tris-Propane buffer (pH 9.0) containing 2 mM 8-hydroxygeraniol, 10 μM GOR and 4 mM nicotinamide dinucleotide (NAD<sup>+</sup>, Cayman Chemicals) unless otherwise specified. Reactions with NAD<sup>+</sup> regeneration contain 5 μM NoxE. The reactions were stopped by extracting directly with 100 μL ethyl acetate (EtoAc) and centrifuged at 17,000 *g* for 5 min before the organic layer was subjected to GC/MS analysis.

### 1.8.3 ISY and NmMLPL *in vitro* assays

200  $\mu$ L-scale *in vitro* assays were performed at 30°C for 2 hours in 100 mM Bis-Tris-Propane buffer (pH 9.0) containing 2 mM 8-oxogeraniol, 1  $\mu$ M ISY, 10  $\mu$ M NmMLPL and 4 mM NADPH unless otherwise specified. Reactions with NADPH regeneration contain an additional 6 mM fumarate, 1  $\mu$ M FumC and 10  $\mu$ M MaeB. The reactions were stopped by extracting directly with 100  $\mu$ L ethyl acetate (EtoAc) and centrifuged at 17,000 g for 5 min before the organic layer was subjected to GC/MS analysis as described previously.

### 1.8.4 NoxE and FumC/MaeB cofactor selectivity assay

For NoxE cofactor selectivity, 200  $\mu$ L-scale *in vitro* assays were performed in a 96-well plate (Corning® 96 Well plate, Sigma-Aldrich) at 30°C in 100 mM Phosphate buffer (pH 7.5) containing 1  $\mu$ M NoxE, 400  $\mu$ M NAD<sup>+</sup> or NADP<sup>+</sup>. The absorbance at 340 nm was measured continuously for 2 hours.

For MaeB cofactor selectivity, 200  $\mu$ L-scale *in vitro* assays were performed in a 96-well plate (Corning® 96 Well plate, Sigma-Aldrich) at 30°C in 100 mM Phosphate buffer (pH 7.5) containing 4 mM fumarate, 1  $\mu$ M FumC, 10  $\mu$ M MaeB, 4 mM NADH or NADPH. The absorbance at 340 nm was measured continuously for 2 hours.

### 1.8.5 Small-scale one-step or two-step one-pot reactions

200  $\mu$ L-scale one-pot one-step *in vitro* assays were performed at 30°C for 2 hours in 100 mM Bis-Tris-Propane buffer (pH 9.0, unless otherwise indicated) containing 2 mM geraniol, 12 mM fumarate, 5  $\mu$ M TfG8H, 10  $\mu$ M FpR, 10  $\mu$ M YkuN, 10  $\mu$ M GOR, 0.5  $\mu$ M ISY, 5  $\mu$ M NmMLPL, 1  $\mu$ M FumC, 10  $\mu$ M MaeB, 5  $\mu$ M NoxE, 100  $\mu$ M NADPH and 100  $\mu$ M NAD<sup>+</sup>. The one-pot two-step *in vitro* assays were performed by directly adding 0.5  $\mu$ M ISY, 5  $\mu$ M NmMLPL and 6 mM fumarate after the conclusion of 2 hours reaction with 2 mM geraniol, 6 mM fumarate, 5  $\mu$ M TfG8H-full, 10  $\mu$ M FpR, 10  $\mu$ M YkuN, 10  $\mu$ M GOR, 1  $\mu$ M FumC, 10  $\mu$ M MaeB, 5  $\mu$ M NoxE, 100  $\mu$ M NADPH and 100  $\mu$ M NAD<sup>+</sup>. The reactions were then stopped by extracting directly with 100  $\mu$ L EtoAc and centrifuged at 17,000 g for 5 min before the organic layer was subjected to GC/MS analysis as described above.

## 1.9. 10 mL-scale nepetalactol and nepetalactone production and purification

10 mL-scale one-pot two-step *in vitro* assays were performed at 28°C, 250 rpm in a 50 mL falcon tube by directly adding 0.5  $\mu$ M ISY, 5  $\mu$ M MLPL and 6 mM fumarate after the conclusion of 2 hours reaction with 2 mM geraniol, 6 mM fumarate, 5  $\mu$ M TfG8H, 10  $\mu$ M FpR, 10  $\mu$ M YkuN, 10  $\mu$ M GOR, 1  $\mu$ M FumC, 10  $\mu$ M MaeB, 100  $\mu$ M NADPH and 100  $\mu$ M NAD<sup>+</sup>.

The 10 mL-scale one-pot drop-in *in vitro* assays were performed by first directly adding 10  $\mu$ M GOR, 5  $\mu$ M NoxE and 100  $\mu$ M NAD<sup>+</sup> after the conclusion of 2 hours reaction with 2 mM geraniol, 6 mM fumarate, 5  $\mu$ M TfG8H, 10  $\mu$ M FpR, 10  $\mu$ M YkuN, 1  $\mu$ M FumC, 10  $\mu$ M MaeB and 100  $\mu$ M NADPH. Then 0.5  $\mu$ M ISY, 5  $\mu$ M NmMLPL and 6 mM fumarate was added after the conclusion of 2 hours reaction with GOR. Aliquots of 2 mM geraniol and 6 mM fumarate was added to 5  $\mu$ M TfG8H, 10  $\mu$ M FpR, 10  $\mu$ M YkuN, 1  $\mu$ M FumC, 10  $\mu$ M MaeB and 100  $\mu$ M NADPH and the reactions were run for 90 minutes each before GC/MS analysis in order to assess the *in-vitro* system's efficiency and robustness. For nepetalactone production 10  $\mu$ M NEPS1 was added to the system at the same time as ISY and MLPL is added. All reactions were stopped by extracting directly with 5 mL EtoAc and centrifuged at 17,000 g for 5 min

before the organic layer was subjected to GC/MS analysis as described above. The organic layer was dried, leaving nepetalactol oil.

## Supporting Tables

**Table S1. Primers used in this study**

| Name        | Sequence (5' – 3')                                                                                                                       | Used in construction of plasmid |
|-------------|------------------------------------------------------------------------------------------------------------------------------------------|---------------------------------|
| pEUB50001 F | ttatcatatgggacagtcccgccgacccccacaccgtctac-<br>ctcgatccggccaaaggatcgacatccccgcgacgcgacgcga<br>actcctcgacaaaggcccggtggtacgcgtggctttccccggc | pEUB50001                       |
| pEUB50001 R | aatactcgagttacggcttcgggcgtaacag                                                                                                          | pEUB50001                       |
| pEUB50002 F | aatagctagcatggctgattgggtaacaggcaaag                                                                                                      | pEUB50002                       |
| pEUB50002 R | aatactcgagttaccagtaatgctccgctgtcatatg                                                                                                    | pEUB50002                       |
| pEUB50003 F | aatacatatggcgaaggcattgatcacatac                                                                                                          | pEUB50003                       |
| pEUB50003 R | aatactcgagttaactgacgtggatcttctctttgtcatg                                                                                                 | pEUB50003                       |
| pEUB50004 F | cagccatattgactaaaactaattctccagccccatc                                                                                                    | pEUB50004                       |
| pEUB50004 R | gggtctcgagtgaacttaataacaactttgacacagtctggg                                                                                               | pEUB50004                       |
| pEUB50005 F | cagccatattgctctggtggtggaaaaggctc                                                                                                         | pEUB50005                       |
| pEUB50005 R | gggtctcgagttggaatgaatctgtagtctctcatctgtcg                                                                                                | pEUB50005                       |
| pEUB50006 F | ttatcatatgatggcgctcgaactgg                                                                                                               | pEUB50006                       |
| pEUB50006 R | ttatctcgagctaatttgacaagtgtgattcataccctt                                                                                                  | pEUB50006                       |
| pEUB50007 F | tggaccatattgaatacagtagcgcgcaaaaagattcg                                                                                                   | pEUB50007                       |
| pEUB50007 R | tggaccaagctttaacgcccggctttcactgc                                                                                                         | pEUB50007                       |
| pEUB50008 F | tggcaagctagcatggatgaccagttaaaacaaagtgcactg                                                                                               | pEUB50008                       |
| pEUB50008 R | tggcaactcgagttacagcgggtgggttgcg                                                                                                          | pEUB50008                       |
| pEUB50009 F | taatgctagcatggcatccacagcgaacc                                                                                                            | pEUB50009                       |
| pEUB50009 R | taatgagctcctatgacggtgcgaagaaaggtaaac                                                                                                     | pEUB50009                       |

**Table S2. Gene sequences used in this study**

**>TfG8H (pEUB50001)**

ATGGGACAGTCCCGCCGACCCACACCGTCTACCTCGATCCGGCCAAAGGAGTCGACATCCCCGCGCAG  
CGACCGAACTCCTCGACAAAGGCCCGGTGGTACGCGTGGCTTTCCCGGCAATTTGGAGGTCTGGGCA  
CTGACTCATGATGCGCCTTTACGTAATGCCTTAGCAGACGAGTCTGTTTTCGTTCGCGGGTGGCGCAAC  
TGGCGCGCCTTATGGCAGGGGAAGTTGACCCTACTCATCCGGTCGCCAACATGTTGCGCGTCGAGAGC  
ATGCTGGCCCCGCTCTGGAGCGGACCATAAGCGCATGCGTGGGTTGGTGCAAGCTGCGTTTTACCCGCCG  
CGTGTGGAAGCGCTTCGCCCGCGCATCGAAGAAATTAATAATGAACTGCTTGATCGTATGGCAGAGTCG  
GACGGTGTAGTTGACCTGAAAGCTGCTTATAGCTTCCCGTTACCTATTCGCGTGATCTCTGAGCTTTTA  
GGGTAAACGAGGAAGACCATCTTACTCTTCAGACTCTTGTGACACGCACACTGAGTGGCACCGATCCG  
GAAGCAAATGCAGACGCCCTTACATTTGTAGCTTCCCTGATTGAAGCGAAGCGTAAAAATCTTGATGAC  
GGTCTGATTTCTGCTATGATTGAGGCCGCGCGGAAGATGGAGATCGCTTATCTGAGACTGAGCTTATT  
CACAATACTCTTCTTTAATCATCGGTGGTTTTCGAAACGACGATGGGGATGATTAGCAATTCAGTACAG  
CTGTTGTTGACGCACCCCGACCAACTTCATCTTTTACGTACCGGACAGGCCAGTTGGGAGAATGCCATC  
GAGGAATGTCTTCGTTTTGAGTCAGCTGTAGTCATGTTACCTTTCTTTATACGACACGCGACGTTGAA  
ATCGACGGGATTACTATCCCCGCGGGAGACGCTGTATTAATTGGCTTTGGTCCCCTAACCGCGATCCA  
CAGGCGTACGACGACCCCTGACCGCTTCGATATCACCCGCCACGCCCGCGCCATCTGCGTTCGGACAC  
GGAGCACACCTGTGCCTGGGAGCCGCATTAGCGCGTCTGGAACCTGCTGATCGACTGCCCGCCTTATTT  
GAACGTTTTCCAGATATCACGTTAGTCGGTGGGCTCCGCCAACCCCTACGGTTTTTCATGAATCACCCA  
CTTAGCCGCCCGTTTTACTTCGTCCGAAACCATAA

**>FpR (pEUB50002)**

ATGGCTGATTGGGTAACAGGCAAAGTCACTAAAGTGCAGAACTGGACCGACGCCCTGTTTAGTCTCACC  
GTTTACGCCCCCGTGTCTCCGTTTACCGCCGGCAATTTACCAAGCTTGGCCTTGAATCGACGGCGAA  
CGCGTCCAGCGCGCCTACTCCTATGTAACTCGCCCGATAATCCCGATCTGGAGTTTTACCTGGTCACC  
GTCCCCGATGGCAAATTAAGCCCACGACTGGCGGCACTGAAACCAGGCGATGAAGTGCAGGTGGTTAGC  
GAAGCGGCAGGATTCTTTGTGCTCGATGAAGTGCCGCACTGCGAAACGCTATGGATGCTGGCAACCGGT  
ACAGCGATTGGCCCTTATTTATCGATTCTGCAACTAGGTAAAGATTTAGATCGCTTCAAAAATCTGGTC  
CTGGTGCACGCCGCACGTTATGCCGCCGACTTAAGCTATTTGCCACTGATGCAGGAACTGGAAAAACGC  
TACGAAGGAAAACCTGCGCATTTCAGACGGTGGTTCAGTCGGGAAACGGCAGCGGGGTGCTCACCGGACGG  
ATACCGGCATTAATTGAAAGTGGGAACTGGAAAGCACGATTGGCCTGCCGATGAATAAAGAAACCAGC  
CATGTGATGCTGTGCGGCAATCCACAGATGGTGCAGGATACACAACAGTTGCTGAAAGAGACCCGGCAG  
ATGACGAAACATTTACGTCGCCGACCGGGCCATATGACAGCGGAGCATTACTGGTAA

**>YkuN (pEUB50003)**

ATGGCGAAGGCATTGATCACATACGCTTCAATGTCTGGCAATACCGAGGACATTGCTTTTCATCATCAAG  
GACACCCCTTCAGGAATACGAGCTTGACATCGACTGTGTTGAAATTAACGATATGGATGCATCCTGCCTT  
ACATCTTATGATTATGTGTTAATCGGGACATATACTGGGAGACGGTGACTTACCATAACGAAGCCGAG  
GACTTCTTTGAAGAGGTAACACAGATCCAACCTGAATGGACTGAAGACCGCTTGCTTTGGGTTCGGCGAT  
TACTCATAACCCTAAATTTTGCGAAGCTGTTAACTTGTTTAACGTAATGTTGCAGGAAGCTGGTTCGGCA  
GTATATCAGGAACTTTGAAAATCGAGTTGGCACCTGAGACCGACGAAGATGTTGAATCATGTCTGTGCC  
TTTGTCTGTGGATTTTTAGCATGGGCAGACTACATGAACAAAGAGAAGATCCACGTCAGTTAA

**>GOR (pEUB50004)**

ATGACTAAAATAATTCTCCAGCCCCATCTGTCATTACTTGCAAGGCTGCTGTGCTTTGGAAATCCGGT  
GAACCACCAAAGGTCGAAGAGATCCAAGTTGATCCACCCAAGGCTTCTGAAGTTCGCATTAAGATGTTG  
TGTGCTTCCTTGTGCCACACCGATTTCCTGGCTTGTAAATGGTCTGCCAGTTCATTTGTTTCCCAGAAAT  
CCAGGTCACGAAGGTGTTGGTATGATCGAATCTGTGCGGTGAAAACGTCACCAACTGAAGGAAGGTGAC  
ATTGTCATGCCATTGTACTTGGGTGAGTGTGGCGAATGCTTGAATTGCAAGTCCGGCAGGACTAACTTG  
TGTCATAAGTATCCGTTGGGTTTTTCTGGCCTGTTGTTGGATGGCACTTCCAGGATGAGCATTGGCGAA  
CAAAAAGTCTACCACCATTCTCTTGTTCACCTGGTCTGAATACATTTGTTATTGAGGCCGCTACGCA  
GTTAAAGTTGACCCAAGGTTAGCTTGCCACATGCTTCTTTCCTGTGTTGCGGTTTTACTACTGGCTTT  
GGCGCCACTTGGAGAGATGTTAATGTTGTCAAAGGCTCTACTGTGCTGTTTTGGGTTTTAGGTGCTGTC  
GGTTTTGGGTGCTGTTCAAGGCGCTAAATCTCAAGGTGCCTCCAGGATCATTGGTTTAGACATTAACGAT  
AAGAAGAGGGGAGAAAGGCCAAGCTTTCGGCATGACCGAATTCATCAACCCCAAGGGCTCCAATAAGTCC  
ATCTCCGAATTGATCAACGAAGCTACTGGTGGTCTAGGTTTTGGACTACGTTTATGAATGCACTGGTGTGTC

CCAGCTCTGTTGAACGAAGCCATTGAGTCCTCTAAAGTTGGTCTGGGTACTGCCGTCTTGATTGGTGCT  
GGTCTAGAAACCTCTGGTCAAATCAAATTCATTCCCCTGTTGTGCGGCAGAAGTGTAAAGGTTCCATT  
TACGGTGGTGTAGGCCAAAGTCCGACTTGCCAACTCTGATTGAGAAGTGCATTAACAAGGAGATTCCA  
ATGGACGAGCTGATGACCCATGAGGTGTCTCTGTCCGAGATCAACAAGGGTTTCGAGTACTTGAAGCAC  
CCAGACTGTGTCAAAGTTGTTATTAAGTTCTAA

**>ISY (pEUB50005)**

ATGTCCTGGTGGTGGAAAAGGTCTATTGGTGTGGCAAAAACCTTGCCAAACCAAAAACAAGGAAAACGGT  
GTCTGCAAGTCTTACAAATCTGTGCGCCTTGGTTCGTCGGTGTACTGGTATTGTTGGTTCTTCTCTGGCT  
GAGGTTTTGAAGTTGCCAGATACTCCAGGTGGTCCATGGAAAGTTTATGGTGTGCTAGAAGACCATGT  
CCAGTCTGGTTGGCTAAGAAGCCAGTCGAGTACATCCAGTGTGACGTCTCCAATAACCAAGAAACCATT  
TCTAAGCTGTCTCCCTGAAAGACATCACTCACATCTTCTATGTCTCCTGGATTGGCTCTGAGGATTGC  
CAGACTAATGCCACCATGTTCAAGAACATCTTGAACCTCGTTATCCAAATGCTTCCAACCTGCAGCAC  
GTCTGCCTACAAACCGGCATTAAGCATTACTTCGGCATTTCGAAGAGGGTTCCAAAGTCGTTCCACAT  
GATTCCCCCTTTACCGAAGATTTGCCACGCTTGAACGTCCCAAACCTTTATCACGACCTGGAAGACATT  
TTGTACGAGGAGACAGGCAAAAATAACCTAACCTGGTCCGTTTACAGGCCAGCTTTGGTTTTCGGTTTT  
TCCCCATGCTCCATGATGAATATCGTCTCTACTCTGTGCGTCTACGCTACTATTTGCAAGCATGAGAAC  
AAGGCTCTGGTTTACCCAGGTTCCAAGAATTCCTGGAATTGCTATGCTGATGCTGTGCTGACTTG  
GTTGCTGAGCATGAAAATTTGGGCTGCTGTTGATCCAAAGGCCAAAACCAGGTTCTGAATTGCAACAAC  
GGCGACGCTCTTCAAATGGAACATATCTGGAAGAAGCTGGCTGAAGAGTTTGGTATCGAGATGGTCTGGT  
TATGTTGAAGGCAAGAAGCAGGTCAGCTGGCCGAATTGATGAAAAGATAAGGATCAAGTCTGGGACGAA  
ATCGTCAAGAAAAACAACCTGGTGCCAACTAAGTTGAAGGAGATTGCCGCCTTCTGGTTTTGCCGATATC  
GCCTTTTGTCTGAAAACCTGATCTCTTCCATGAACAAGTCCAAGGAGCTGGGTTTCTTAGGCTTCAGG  
AACTCTATGAAGTCTTTCGTCTCCTGTATCGACAAGATGAGAGACTACAGATTCATTCATAA

**>MLPL (pEUB50006)**

ATGGCGTCGAAACTGGAGATCGAAATCGAACTTAAATCGGACGTGGAAAAAATGTGGAAACATTTCAAG  
GAGTTTACAAAACCTGTTCCCGAAGGCTTGCCCGCATTTGTATGAAAAGATTGATGTGATTGAGGGGGAT  
GGCATCTCGGTGGGGACTATTTTTCGTGTCAACGTTGAAGCCTACAGAGTTAAATCCAGTAGTGATGGTC  
ACGAAAGAAAAGATTGATTTTTTAGATGACGAAAATAAAATGTTACGCTATTCTTACATGGAGGGTGAG  
ATTTTTAAAGAACTACAAGAACCTTCGTGGGACGGTACACATGTCCAGCTCGAAGTCCGGTGGAACTATC  
TTCAAGTACTCGGGTGAATTTGAAAAGGCGAACGAACAGGTCCTCCGACCCCGTATTCTTTAAGGACTTC  
ATGGTCATTGTCTTTCAAGGGCTTGACGACTACATCTTGAAGGGTATGAATCACACTTGTCAAAAATTAG

**>NEPS1 (pEUB50009)**

ATGGCATCCACAGCGAACCCGATGCAGGTAATGAAAAAAGTTAGAAGGCAAAGTAGTGATTGTAAC  
GGCGGTGCATCAGGTATAGGACAAACCGCTGCTCGTGTGTTTCGCACAGCATGGTGCAGGGGCGGTAGTC  
ATCGCAGACATACAGTCAGAGGTGGGAAATCAGTTGCTAAAAGTATCGGTGATCCTTGTCTGTTATGTT  
CAATGTGATGATTCGACGAAGAAGAAGTTAAGAGTATGATTGAGTGGACGGCGTCAGCTTACGGCGGG  
TTAGATATGATGTTCTCTAATGTGGGGATAATGTCCAAAAGTGCCCAAACCTGTAATGGATTTGGATCTT  
CTGGAATTTGACAAAAGTATGAGAGTCAACGCAAGAGGAATGGCAGCATGCCTGAAACACGCAGCCCGT  
AAAATGGTCGAGTTGGGCACGAGGGGACTATAATCTGCACAACAACCTCCGCTGTCAAGTCTGGTGGC  
CAATCAATGACAGACTATGCGATGTCAAACACGCGGTTATGGGTCTGGTCAGGTGAGCCAGCATCCAA  
TTAGGTGCCACGGAATTAGAGTGAATTGTGTTACTCCTTCAGTCGTGTTAACGCCGTTAGCACAAAGA  
ATGGGTCTGGCGACGCCAGATGATTTCCATACGCATTTTGGTAATTTTACTTCACTAAAGGGCGTGTAC  
CTTACCCAGAGCAAGTAGCTGAGGCGGTTGTGTATCTTGCCTCAGATGACGCCGCTTTCATCACCGGG  
CATGACCTGGTACTTGATGGGGGCTTCTATGTTTACCTTCTTCGCACCGTCATAG

**>NoxE (pEUB50010)**

ATGAAAATCGTAGTTATCGGTACAAACACGCAGGCATTGCTACAGCGAATACATTACTTGAACAATAT  
CCCGGGCATGAAATGTCATGATTGACCGTAATAGCAACATGAGTTATCTAGGTTGTGGCACAGCAATT  
TGGGTTGGAAGACAAATTGAAAAACAGATGAATTTTTATGCCAAAGCAGAGGATTTTGAGGCAAAA  
GGGGTAAAAATTTTACTGAAACAGAAAGTTTCAGAAATTTGATTTTCTAATAAAGAAAGTTTATGCAAAA  
ACTAAATCTGATGATGAAATAATTGAAGCTTACGACAAGCTTGTTTTAGCAACAGGTTACGTTCAATT  
ATTCTAATCTACCAGGCAAAGACCTTAAGGGAATTCATTTTCTGAAACTTTTTCAAGAAGGTCAAGCA  
ATTGACGCAGAATTTGCCAAAGAAAAAGTCAAGCGTATCGCAGTCATTGGTGCAGGATATATCGGTACA  
GAGATTGCGGAAGCAGCTAAACGTCGGGGTAAAGAAGTTCTTCTCTTTGACGCTGAAAATACTTCACTT  
GCATCATATTATGATGAAGAATTTGCCAAAGGAATGGATGAAAACCTTGCTCAACATGGAATTGAACTT

CATTTTGGAGAACTGGCCAAAGAATTTAAAGCGAATGAGGAAGGTTATGTATCACAAATCGTAACCAAC  
AAGGGCACTTATGATGTTGATCTTGTTCATCAATTGTATTGGTTTTACTGCCAACAGTGCCTTGGCAAGT  
GATAAGTTAGCTACCTTCAAAAATGGCGCAATCAAGGTGGATAAGCATCAACAAAAGTAGTGATCCAGAT  
GTTTACGCGGTAGGTGATGTTGCGACAATTTATTCTAATGCCTTGCAAGATTTTACTTATATCGCTCTT  
GCCTCAAACGCTGTTCCGGTCAGGAATTGTCGCAGGACACAATATTGGTGGAAAAGAATTAGAATCTGTT  
GGTGTCAAGGTTCTAATGGTATTTTCGATTTTTGGTTACAATATGACTTCTACAGGACTTTCTGTGTTAAA  
GCTGCTAAAAAATTAGGTTTAGAAGTTTCATTTAGTGATTTTTGAAGATAAACAAAAAGCTTGGTTCTT  
CATGAAAACAACGATAGTGTGAAAATTCGTATCGTATATGAGACAAAAAGTCGCAGAATTATTGGAGCA  
CAACTTGCTAGTAAAAGTGAGATAATTGCAGGAAATATAAATATGTTTCAGTTTAGCGATTCAAGAGAAA  
AAAACAATTGATGAACTAGCTTTGCTTGATTTATTCTTTCTCCCCACTTCAACAGTCCATATAATTAT  
ATGACAGTTGCAGCTTTGAATGCCAAATAA

**>FumC (pEUB50007)**

ATGAATACAGTACGCAGCGAAAAAGATTCGATGGGGGCGATTGATGTCCCAGGAGATAAGCTGTGGGGC  
GCACAACTCAACGCTCGCTGGAGCATTTCCGCATTTTCGACGGAGAAAATGCCACCTCACTGATTCAT  
GCGCTGGCGCTAACCAAGCGTGCAGCGGCAAAAGTTAATGAAGATTTAGGCTTGTGTCTGAAGAGAAA  
GCGAGCGCCATTCGTCAGGCGGCGGATGAAGTACTGGCAGGACAGCATGACGACGAATTCGCGCTGGCT  
ATCTGGCAGACCGGCTCCGGCACGCAAAGTAACATGAACATGAACGAAGTGCTGGCTAACCGGGCCAGT  
GAATTACTCGGCGGTGTGCGCGGGATGGAACGTAAAAGTTACCCCTAACGACGACGTGAACAAAAGCCAA  
AGTTCCAACGATGTCTTCCGACGGCGATGCACGTTGCGGCGCTGCTGGCGCTGCGCAAGCAACTCATT  
CCTCAGCTTAAAACCTGACACAGACACTGAATGAGAAATCCCGTGCTTTTGGCGATATCGTCAAAATT  
GGTCGTACTCACTTGCAGGATGCCACGCCGTTAACGCTGGGGCAGGAGATTTCCGGCTGGGTAGCGATG  
CTCGAGCATAATCTCAAACATATCGAATACAGCCTGCCTCACGTAGCGGAACCTGGCTCTTGGCGGTACA  
GCGGTGGGTACTGGACTAAATACCCATCCGGAGTATGCGCGTGCAGTAGCAGATGAACTGGCAGTCATT  
ACCTGTGCACCGTTTGTACC GCGCCGAACAAATTTGAAGCGCTGGCGACCTGTGATGCCCTGGTTTCAG  
GCGCACGGCGCTTGAAGGGTGGCTGCGTCACTGATGAAAATCGCCAATGATGTCCGCTGGCTGGCC  
TCTGGCCCGCTGCGGAATTGGTGAATCTCAATCCCGGAAAATGAGCCGGGACGCTCAATCATGCCG  
GGGAAAGTGAACCAACACAGTGTGAGGCATTAACCATGCTCTGCTGTCAGGTGATGGGGAACGACGTG  
GCGATCAACATGGGGGGCGCTTCCGGTAACTTTGAACTGAACGCTTCCGTTCCAATGGTATCCACAAT  
TTCTGCAATCGGTGCGCTTGCTGGCAGATGGCATGGAAAGTTTTAACAAACTGCGCAGTGGGTATT  
GAACCGAATCGTGAGCGAATCAATCAATTACTCAATGAATCGCTGATGCTGGTGACTGCGCTTAACACC  
CACATTGGTTATGACAAAGCCGCGGAGATCGCCAAAAAAGCGCATAAAGAAGGGCTGACCTTAAAAGCT  
GCGGCCCTTGCCTGGGGTATCTTAGCGAAGCCGAGTTTGACAGCTGGGTACGGCCAGAACAGATGGTC  
GGCAGTATGAAAGCCGGGCGTTAA

**>MaeB (pEUB50008)**

ATGGATGACCAGTTAAAAACAAAGTGCACCTTGATTTCCATGAATTTCCAGTTCCAGGGAAAAATCCAGTT  
TCTCCAACCAAGCCTCTGGCAACACAGCGCGATCTGGCGCTGGCCTACTCACCAGGCGTTGCCGCACCT  
TGTCTTGAAATCGAAAAAGACCCGTTAAAAGCCTACAAATATACCGCCCGAGGTAACCTGGTGGCGGTG  
ATCTCTAACGGTACGGCGGTGCTGGGGTTAGGCAACATTTGGCGCGCTGGCAGGCAAACCGGTGATGGAA  
GGCAAGGGCGTTCTGTTTAAAGAAATTCGCCGGGATTGATGTATTTGACATTGAAGTTGACGAACTCGAC  
CCGGACAAATTTATTGAAGTTGTGCGCCGCGCTCGAACCAACCTTCGGCGGCATCAACCTCGAAGACATT  
AAAGCGCCAGAATGTTCTATATTGAACAGAACTGCGCGAGCGGATGAATATTCCGGTATTCCACGAC  
GATCAGCACGGCACGGCAATTATCAGCACTGCCGCCATCCTCAACGGCTTGCAGCTGGTGGAGAAAAAC  
ATCTCCGACGTGCGGATGGTGGTTTTCCGGCGCGGGTGCAGCAATCGCCTGTATGAACCTGCTGGTA  
GCGCTGGGTCTGCAAAAACATAACATCGTGGTTTTGCGATTCAAAAGGCGTTATCTATCAGGGCCGTGAG  
CCAAACATGGCGGAAACCAAGCCGCATATGCGGTGGTGGATGACGGCAAACGTACCCTCGATGATGTG  
ATTGAAGGCGCGGATATTTTCTGGGCTGTTCCGGCCCGAAAGTGCTGACCCAGGAAATGGTGAAGAAA  
ATGGCTCGTGCGCCAATGATCCTGGCGCTGGCGAACCCGGAACCGGAAATTTCTGCCGCGCTGGCGAAA  
GAAGTGCGTCCGGATGCCATCATTTCACCGGTGCTTCTGACTATCCGAACCAGGTGAACAACGTCTTG  
TGCTTCCGTTTCTTCCGTTGGCGCGCTGGACGTTGGCGCAACCGCCATCAACGAAGAGATGAAACTG  
GCGGCGGTACGTGCGATTGCAGAACTCGCCATGCGGAACAGAGCGAAGTGGTGGCTTTCAGCGTATGGC  
GATCAGGATCTGAGCTTTGGTCCGGAATACATCATTCCAAAACCGTTTGATCCGCGCTTGATCGTTAAG  
ATCGCTCCTGCGGTGCTAAAGCCGCGATGGAGTCGGGCGTGGCGACTCGTCCGATTGCTGATTTTCGAC  
GTCTACATCGACAAGCTGACTGAGTTCGTTTACAAAACCAACCTGTTTATGAAGCCGATTTTCTCCCAG  
GCTCGCAAAGCGCCGAAGCGCGTTGTTCTGCCGGAAGGGGAAGAGGCGCGCTTCTGCATGCCACTCAG  
GAACTGGTAACGCTGGGACTGGCGAAACCGATCCTTATCGGTGCTCCGAACGTGATCGAAATGCGCATT  
CAGAACTGGGCTTGCAGATCAAAGCGGGCGTTGATTTTGAGATCGTCAATAACGAATCCGATCCGCGC



TTTAAAGAGTACTGGACCGAATACTTCCAGATCATGAAGCGTCGCGGCGTCACTCAGGAACAGGCGCAG  
CGGGCGCTGATCAGTAACCCGACAGTGATCGGGCGGATCATGGTTCAGCGTGGGGAAGCCGATGCAATG  
ATTTGCGGTACGGTGGGTGATTATCATGAACATTTTAGCGTGGTGAAAAATGTCTTTGGTTATCGCGAT  
GGCGTTCACACCCGAGGTGCCATGAACGCGCTGCTGCTGCCGAGTGGTAACACCTTTATTGCCGATACA  
TATGTTAATGATGAACCGGATGCAGAAGAGCTGGCGGAGATCACCTTGATGGCGGCAGAACTGTCCGT  
CGTTTTGGTATTGAGCCGCGCGTTGCTTTGTTGTCGCACTCCAACCTTGGTTCTTCTGACTGCCCGTCG  
TCGAGCAAAATGCGTCAGGCGCTGGAACGGTCAGGGAACGTGCACCAGAACTGATGATTGATGGTGAA  
ATGCACGGCGATGCAGCGCTGGTGGAAAGCGATTTCGCAACGACCGTATGCCGGACAGCTCTTTGAAAGGT  
TCCGCCAATATTCTGGTGATGCCGAACATGGAAGCTGCCCGCATTAGTTACAACCTTACTGCGTGTTTCC  
AGCTCGGAAGGTGTGACTGTGCGCCCGGTGCTGATGGGTGTGGCGAAACCGGTTACGTGTTAACGCCG  
ATCGCATCGGTGCGTCGTATCGTCAACATGGTGGCGCTGGCCGTGGTAGAAGCGCAAACCCAACCGCTG  
TAA

**Table S3. Plasmids used in this study**

| <b>Plasmid</b> | <b>Vector</b> | <b>Encoded protein</b>  |
|----------------|---------------|-------------------------|
| pET-28a        | pET-28a       | vector only             |
| pET-22a        | pET-22a       | vector only             |
| pEUB50001      | pET-28a       | T7- <i>N</i> -his-TfG8H |
| pEUB50002      | pET-28a       | T7- <i>N</i> -his-FpR   |
| pEUB50003      | pET-28a       | T7- <i>N</i> -his-YkuN  |
| pEUB50004      | pET-28a       | T7- <i>N</i> -his-GOR   |
| pEUB50005      | pET-28a       | T7- <i>N</i> -his-ISKY  |
| pEUB50006      | pET-28a       | T7- <i>N</i> -his-MLPL  |
| pEUB50007      | pET-28a       | T7- <i>N</i> -his-FumC  |
| pEUB50008      | pET-28a       | T7- <i>N</i> -his-MaeB  |
| pEUB50009      | pET-28a       | T7- <i>N</i> -his-NEPS1 |
| pEUB50010      | pET-22a       | T7-NoxE-C-his           |

**Table S4. Cost analysis for 1 g nepetalactol production**

| component                                           | mass per 1 g nepetalactol (g) | component cost (\$/g)          | cost per 1 g nepetalactol (\$)                 | commercial source |
|-----------------------------------------------------|-------------------------------|--------------------------------|------------------------------------------------|-------------------|
| geraniol                                            | 0.92                          | \$0.54                         | \$0.53                                         | Fisher Scientific |
| enzyme                                              | 2.28                          | \$2.50 (low)<br>\$25.00 (high) | \$6.13 (low)<br>\$61.29 (high)                 | *                 |
| NADPH                                               | 0.076                         | \$450.00                       | \$36.77                                        | Calzyme           |
| NAD <sup>+</sup>                                    | 0.068                         | \$14.00                        | \$1.02                                         | Calzyme           |
| fumarate                                            | 0.68                          | \$0.04                         | \$0.03                                         | Fisher Scientific |
| BSA                                                 | 0.123                         | \$31.70                        | \$4.19                                         | Fisher Scientific |
| bis-tris propane                                    | 28.4                          | \$0.60                         | \$18.32                                        | Fisher Scientific |
| <b>Total material cost to make 1 g nepetalactol</b> |                               |                                | <b>\$67.01 (low)</b><br><b>\$122.17 (high)</b> |                   |

\* Enzyme cost at scale is estimated to be between \$250 and \$2500 per kilogram based on communication with industry. For our material cost estimate, we have taken the upper bound (\$2.50/g) as our low price point and a 10-fold increase (\$25.00/g) as our high price point to account for the absence of economies of scale.

## Supporting Figures

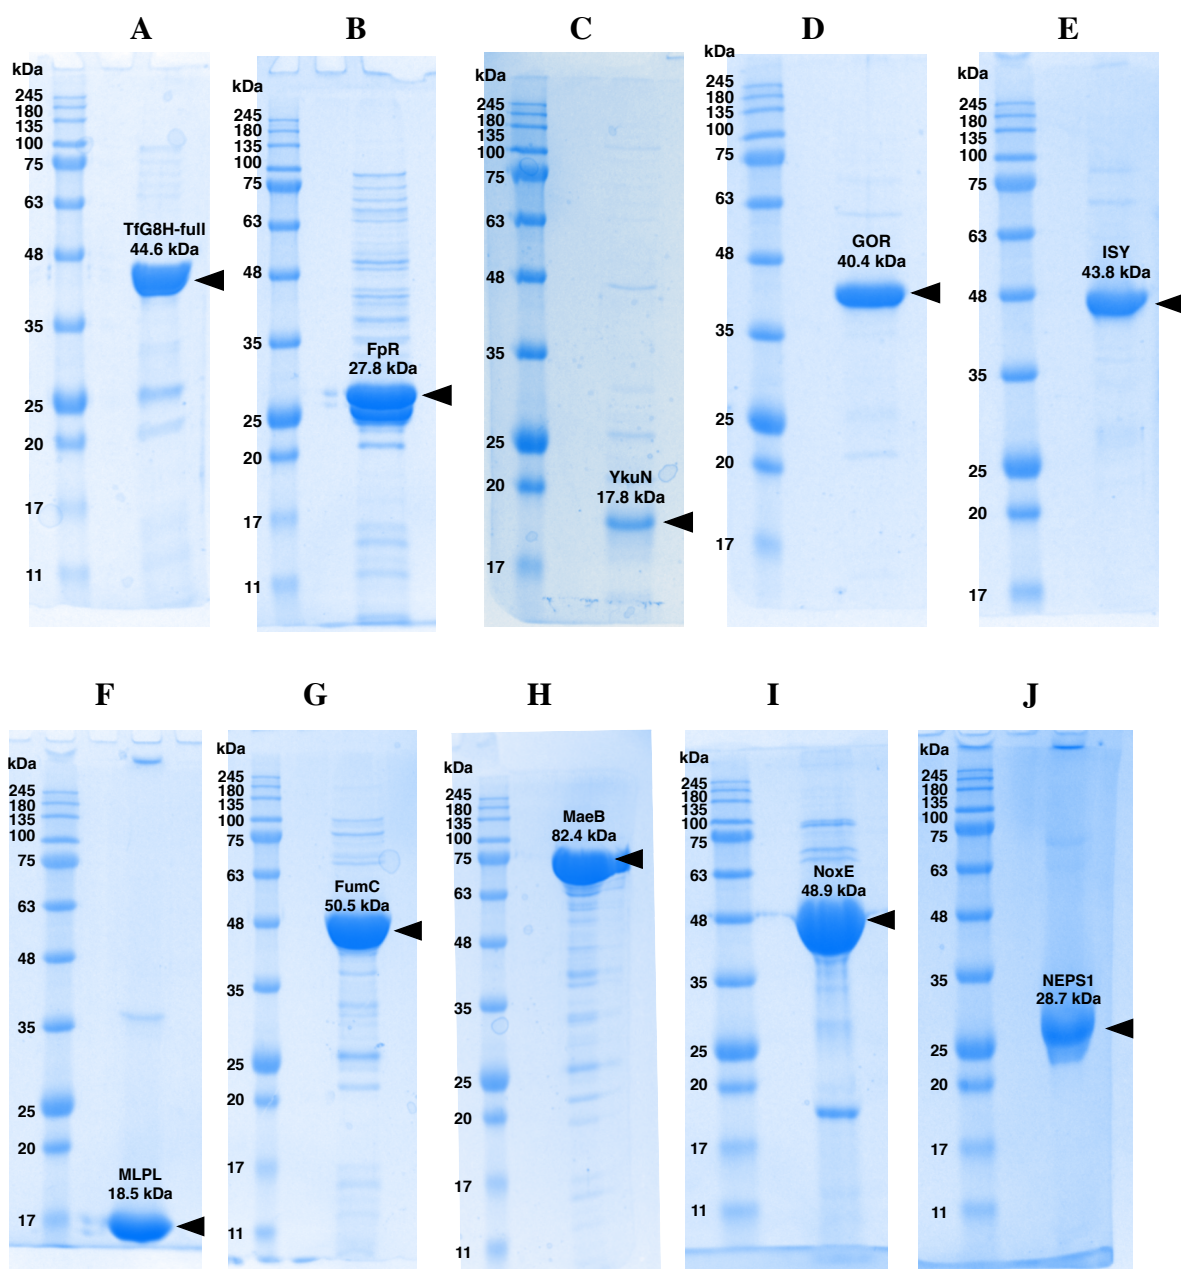

**Figure S1.** SDS-PAGE of purified proteins A. TfG8H, B. FpR, C. YkuN, D. GOR, E. ISY, F. MLPL, G. FumC, H. MaeB, I. NoxE, J. NEPS1

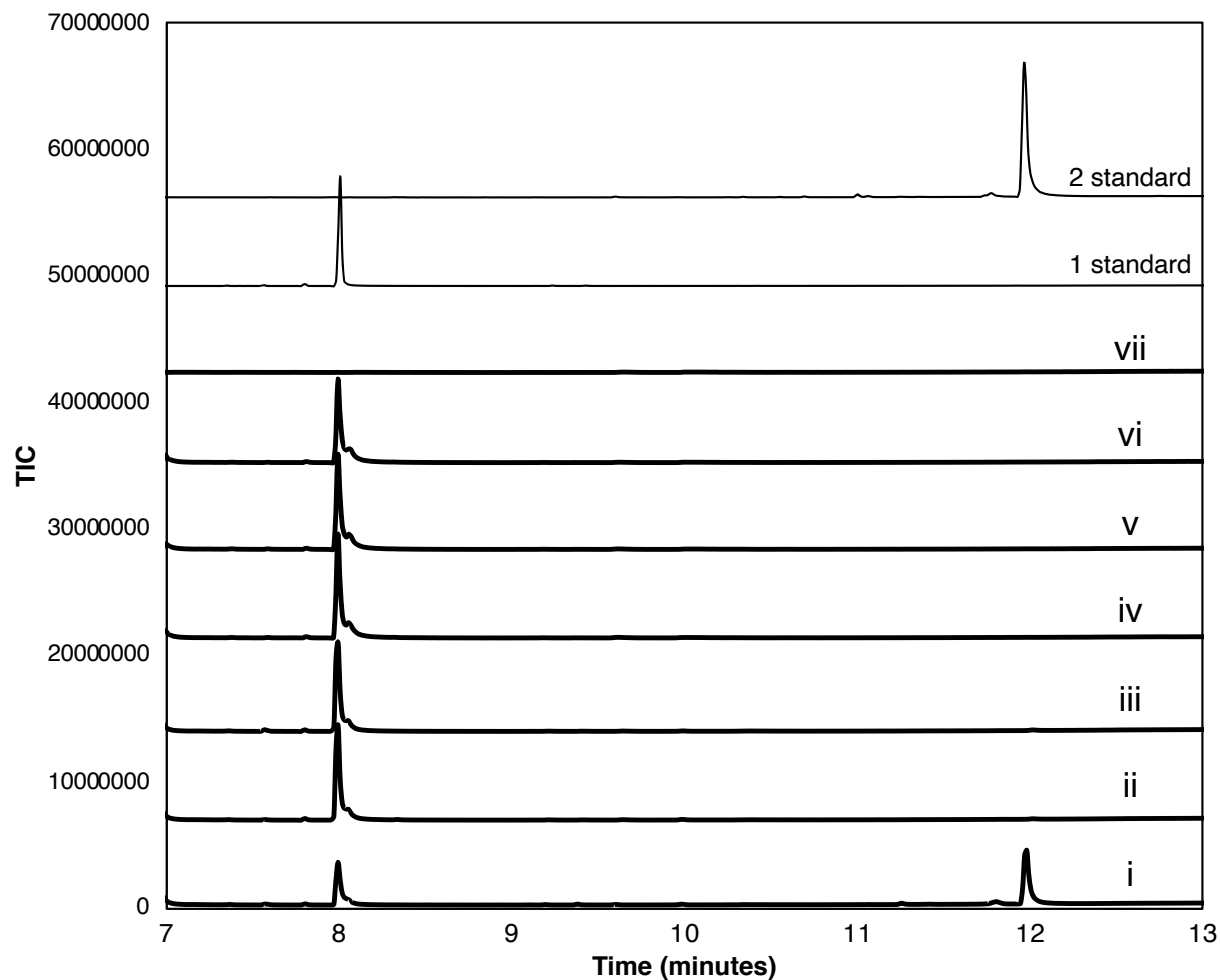

**Figure S2.** GC/MS analysis of geraniol hydroxylation activity of TfG8H. Each reaction contains 2 mM geraniol, 5  $\mu$ M TfG8H, 10  $\mu$ M FpR, 10  $\mu$ M YkuN, 4 mM NADPH unless otherwise specified, i. sample reaction, ii. only 100  $\mu$ M NADPH, iii. no TfG8H, iv. no FpR, v. no YkuN, vi. no NADPH, vii. no geraniol.

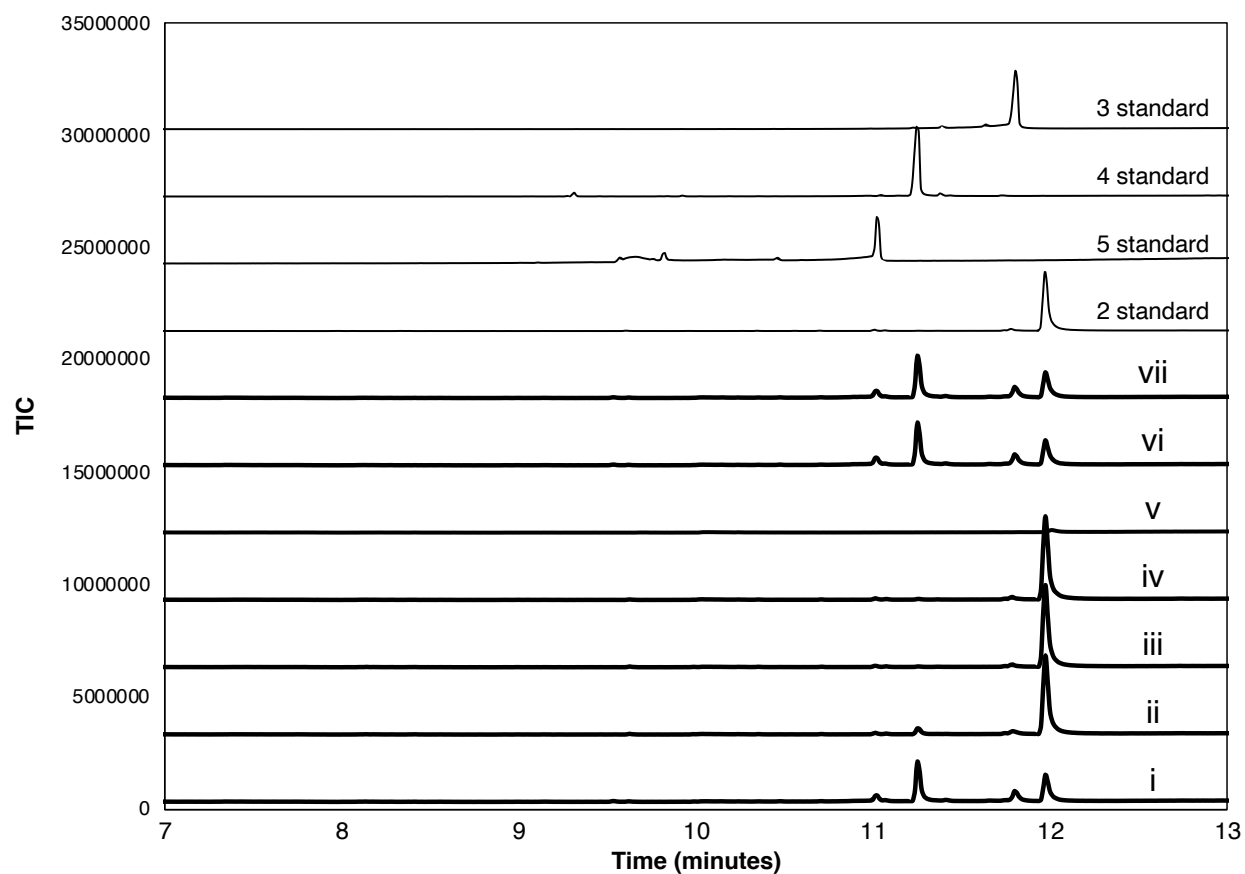

**Figure S3.** GC/MS analysis of 8-hydroxygeraniol oxidation by GOR. Each reaction contains 2 mM 8-hydroxygeraniol, 10  $\mu$ M GOR and 4 mM  $\text{NAD}^+$  in BTP buffer (pH 9.0) unless otherwise specified, i. sample reaction, ii. only 100  $\mu$ M  $\text{NAD}^+$ , iii. no GOR, iv. no  $\text{NAD}^+$ , v. no 8-hydroxygeraniol, vi. Phosphate buffer pH 7.5, vii. Tris-HCl buffer pH 8.0.

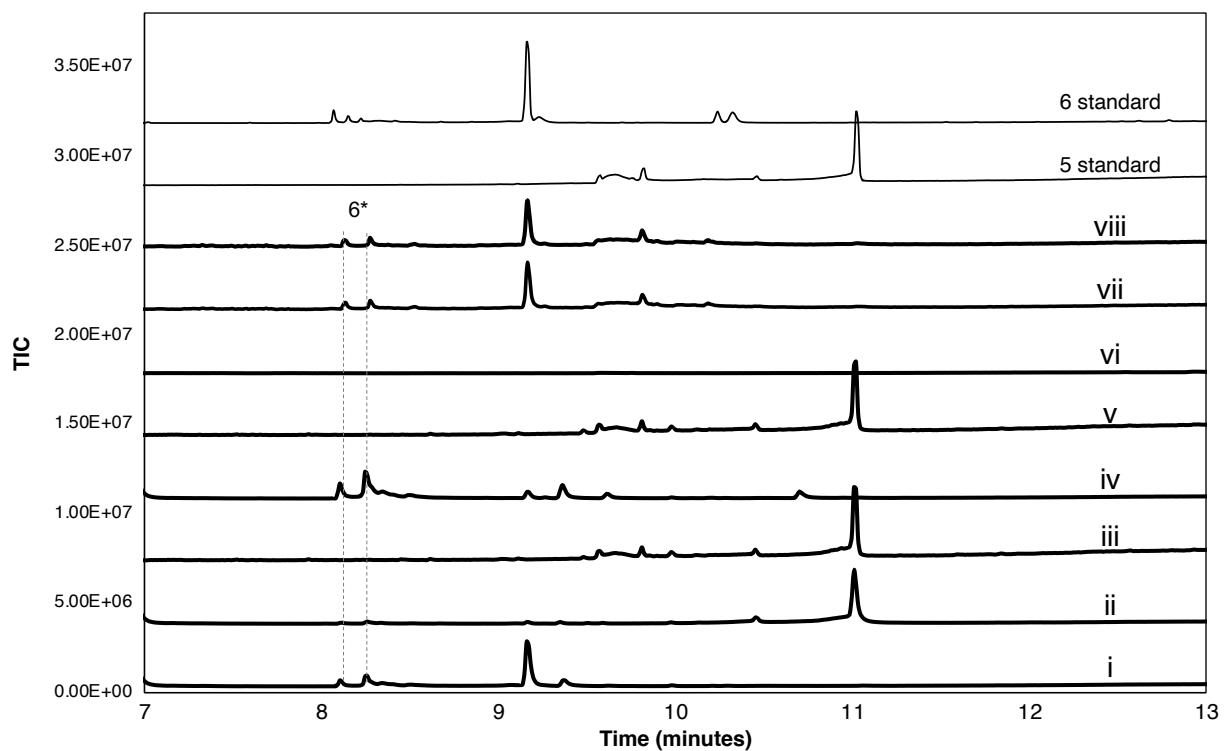

**Figure S4.** GC/MS analysis of 8-oxogeranial reduction and cyclization by ISY and MLPL. Each reaction contains 2 mM 8-oxogeranial, 1  $\mu$ M ISY, 10  $\mu$ M MLPL and 4 mM NADPH in BTP buffer (pH 9.0) unless otherwise specified, i. sample reaction, ii. only 100  $\mu$ M NADPH, iii. no ISY, iv. no MLPL, v. no NADPH, vi. no 8-oxogeranial, vii. Phosphate buffer pH 7.5, viii. Tris-HCl buffer pH 8.0.

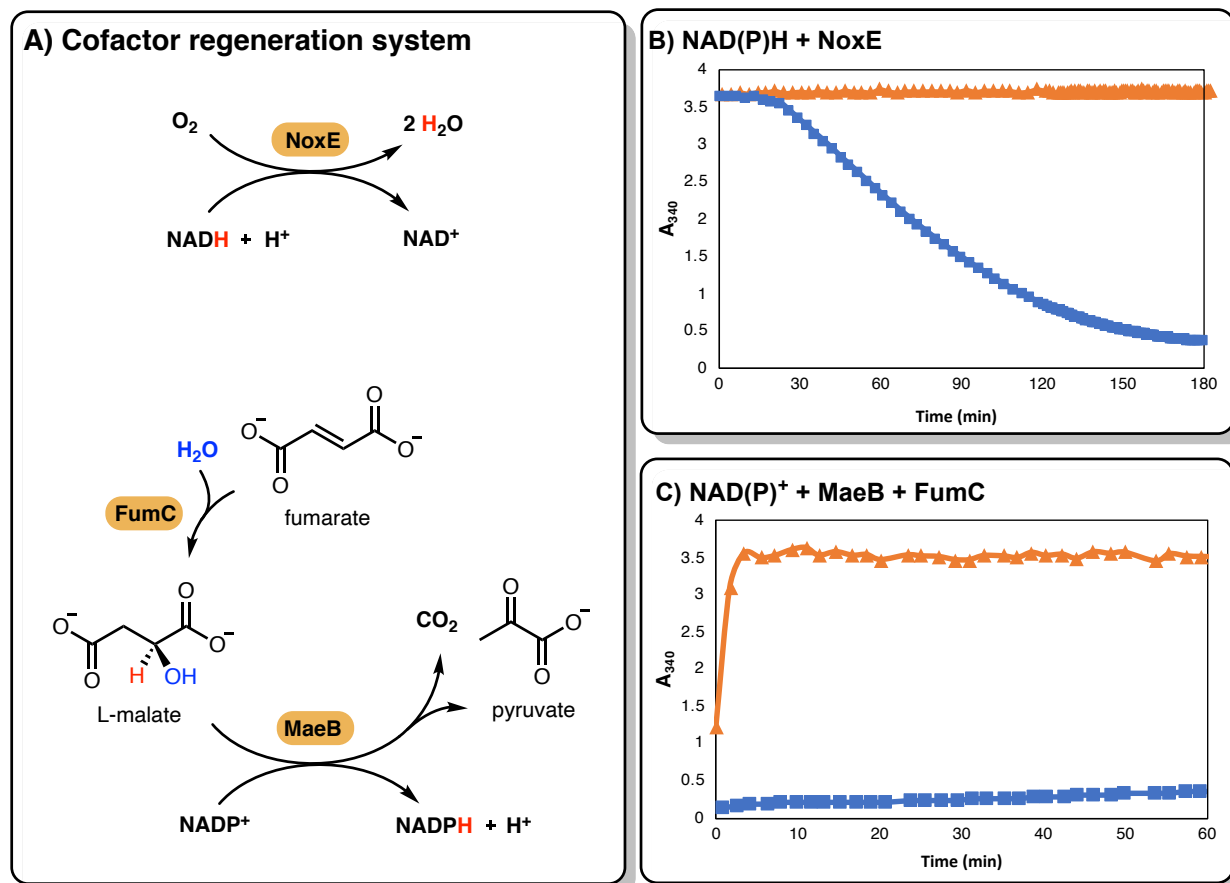

**Figure S5.** (A) Cofactor regeneration systems (B) NoxE is used as a NAD<sup>+</sup> regeneration enzyme. Substrate specificity for NADH (blue) over NADPH (orange) is confirmed when 1  $\mu$ M NoxE, 400  $\mu$ M NAD<sup>+</sup> or NADP<sup>+</sup> was used; (C) FumC/MaeB pair is used as a NADPH regeneration system. Substrate specificity for NADP<sup>+</sup> over NAD<sup>+</sup> is confirmed when 4 mM fumarate, 1  $\mu$ M FumC, 10  $\mu$ M MaeB, 4 mM NADH or NADPH was used. Both assays in (B) and (C) were performed by spectroscopically at  $\lambda=340$  nm.



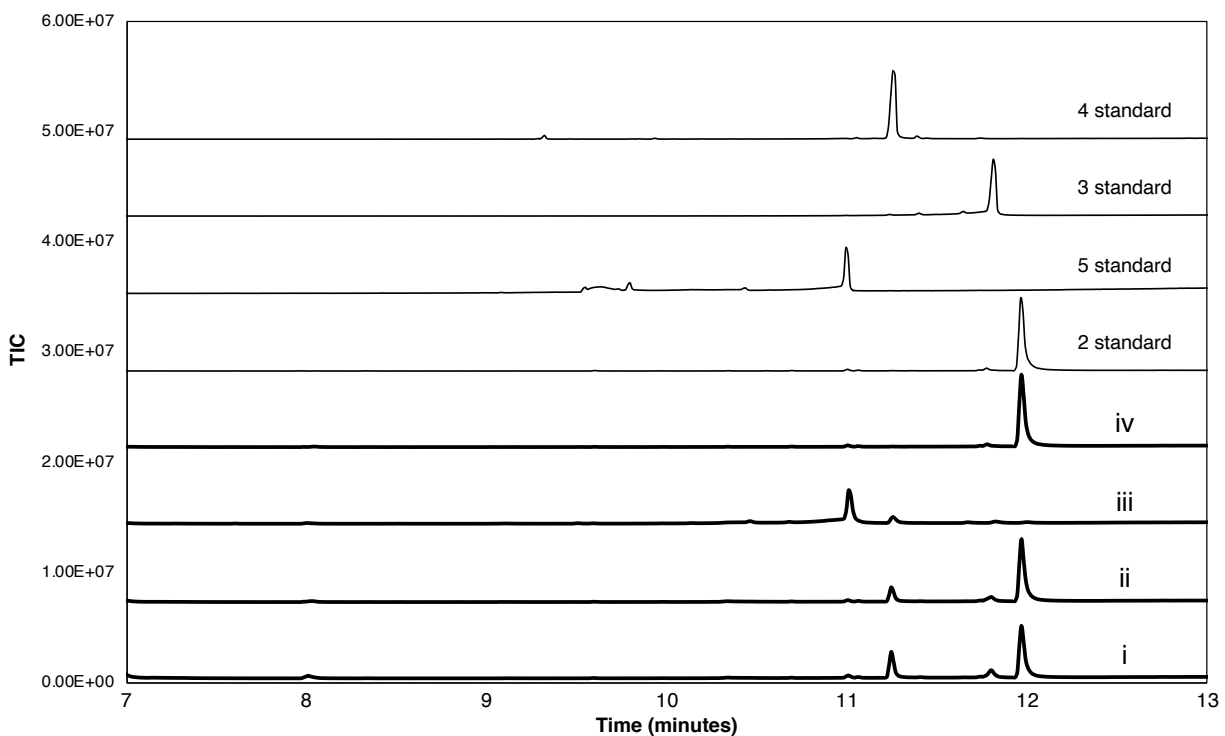

**Figure S6.** GC/MS analysis of 8-hydroxygeraniol oxidation with GOR with  $\text{NAD}^+$  regeneration. Each reaction contains 2 mM 8-hydroxygeraniol, 10  $\mu\text{M}$  GOR, 5  $\mu\text{M}$  NoxE and 4 mM  $\text{NAD}^+$  in BTP buffer (pH 9.0) unless otherwise specified, i. no NoxE, ii. no NoxE with only 100  $\mu\text{M}$   $\text{NAD}^+$ , iii. with NoxE and only 100  $\mu\text{M}$   $\text{NAD}^+$ , iv. no GOR.

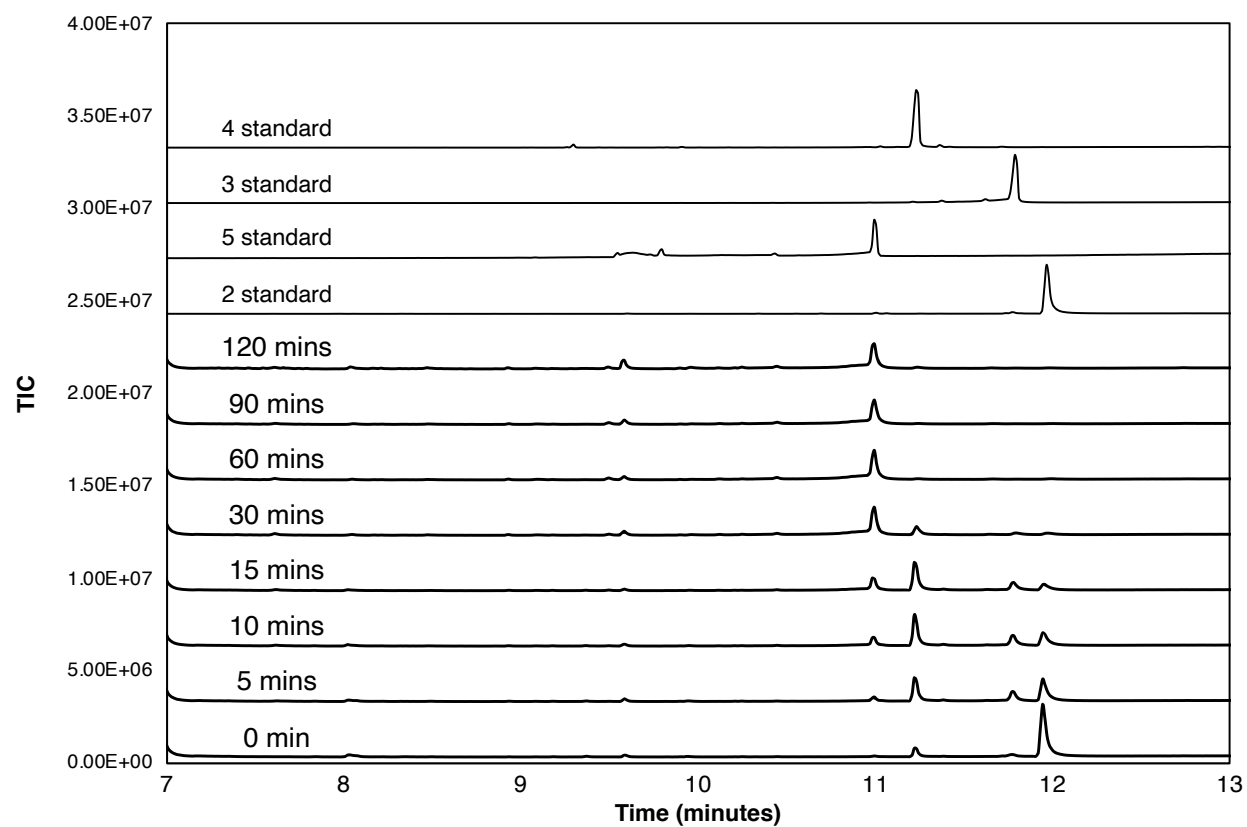

**Figure S7.** Time-course of 8-hydroxygeraniol oxidation with GOR with  $\text{NAD}^+$  regeneration. Each reaction contains 2 mM 8-hydroxygeraniol, 10  $\mu\text{M}$  GOR, 5  $\mu\text{M}$  NoxE and 100  $\mu\text{M}$   $\text{NAD}^+$  in BTP buffer (pH 9.0).

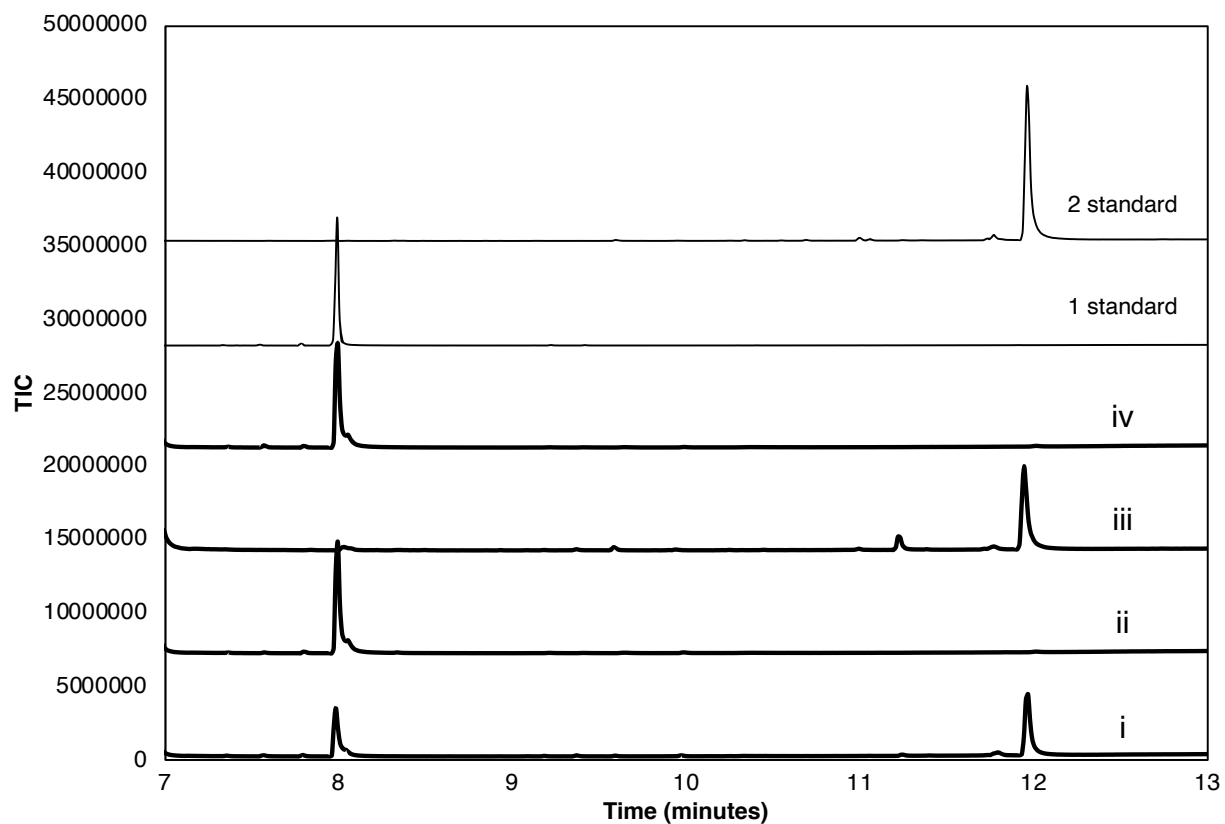

**Figure S8.** Geraniol hydroxylation by TfG8H with NADPH regeneration. Each reaction contains 2 mM geraniol, 6 mM fumarate, 5  $\mu$ M TfG8H, 10  $\mu$ M FpR, 10  $\mu$ M YkuN, 1  $\mu$ M FumC, 10  $\mu$ M MaeB and 4 mM NADPH in BTP buffer (pH 9.0) unless otherwise specified, i. no FumC/MaeB, ii. no FumC/MaeB with only 100  $\mu$ M NADPH, iii. with FumC/MaeB and only 100  $\mu$ M NADPH, iv. no TfG8H.

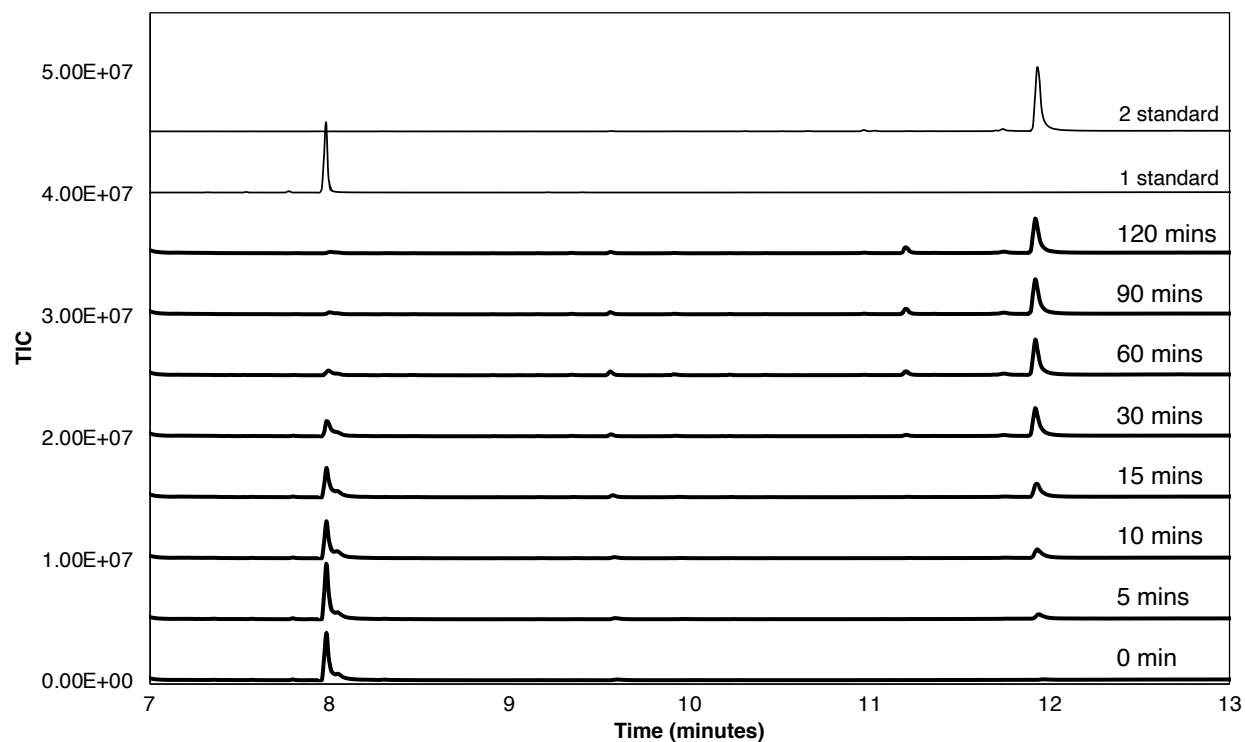

**Figure S9.** Time-course of geraniol hydroxylation by TfG8H with NADPH regeneration. Each reaction contains 2 mM geraniol, 6 mM fumarate, 5  $\mu$ M TfG8H, 10  $\mu$ M FpR, 10  $\mu$ M YkuN, 1  $\mu$ M FumC, 10  $\mu$ M MaeB and 100  $\mu$ M NADPH in BTP buffer (pH 9.0).

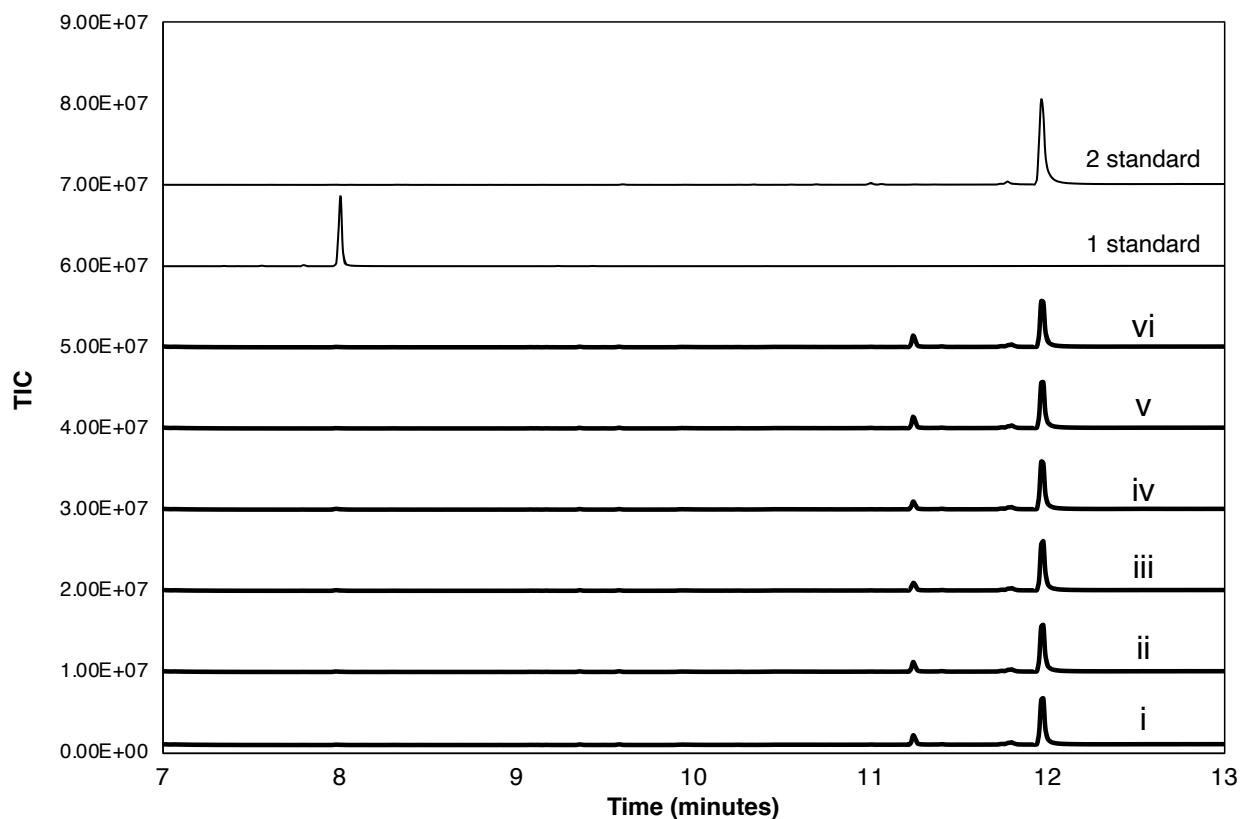

**Figure S10.** Geraniol hydroxylation by TfG8H with NADPH regeneration with different concentrations of pyruvate. Each reaction contains 2 mM geraniol, 6 mM fumarate, 5  $\mu$ M TfG8H, 10  $\mu$ M FpR, 10  $\mu$ M YkuN, 1  $\mu$ M FumC, 10  $\mu$ M MaeB, 100  $\mu$ M NADPH and different concentrations of pyruvate in BTP buffer (pH 9.0). i. 0 mM pyruvate, ii. 2 mM pyruvate, iii. 4 mM pyruvate, iv. 6 mM pyruvate, v. 9 mM pyruvate, vi. 12 mM pyruvate.

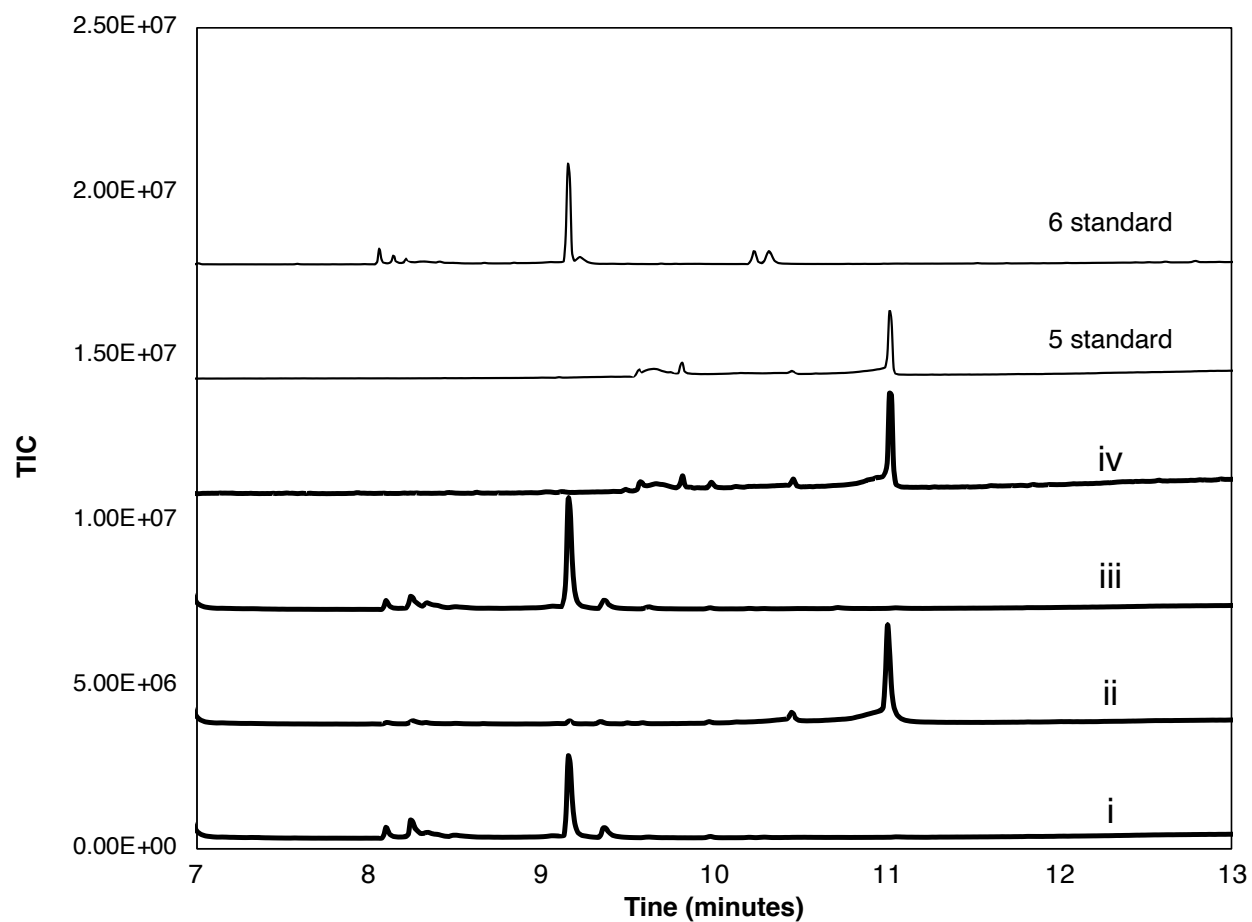

**Figure S11.** 8-oxogeranial reduction and cyclization by ISY/MLPL with NADPH regeneration. Each reaction contains 2 mM 8-oxogeranial, 6 mM fumarate, 0.5  $\mu$ M ISY, 5  $\mu$ M MLPL, 1  $\mu$ M FumC, 10  $\mu$ M MaeB and 4 mM NADPH in BTP buffer (pH 9.0) unless otherwise specified, i. no FumC/MaeB, ii. no FumC/MaeB with only 100  $\mu$ M NADPH, iii. with FumC/MaeB and only 100  $\mu$ M NADPH, iv. no ISY/MLPL.

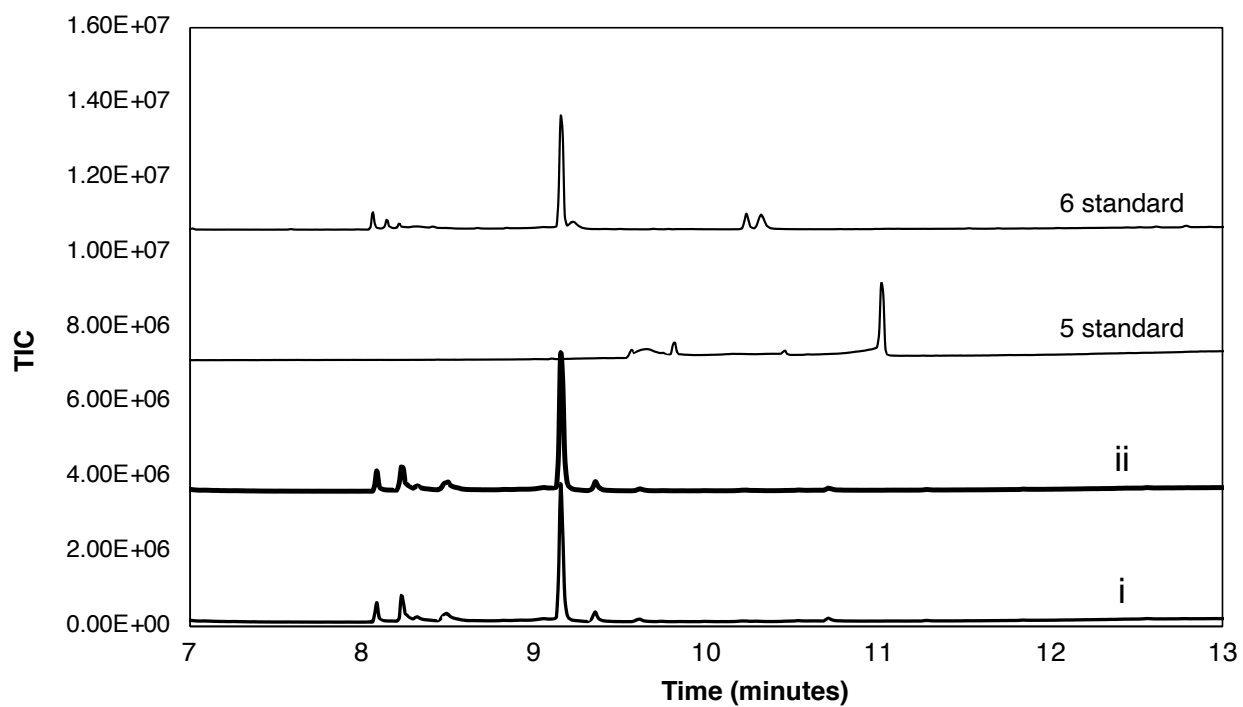

**Figure S12.** 8-oxogeranial reduction and cyclization by ISY/MLPL with NADPH regeneration with additional pyruvate. Each reaction contains 2 mM 8-oxogeranial, 6 mM fumarate, 0.5  $\mu$ M ISY, 5  $\mu$ M MLPL, 1  $\mu$ M FumC, 10  $\mu$ M MaeB and 100  $\mu$ M NADPH in BTP buffer (pH 9.0), i. no pyruvate, ii. 12 mM pyruvate.

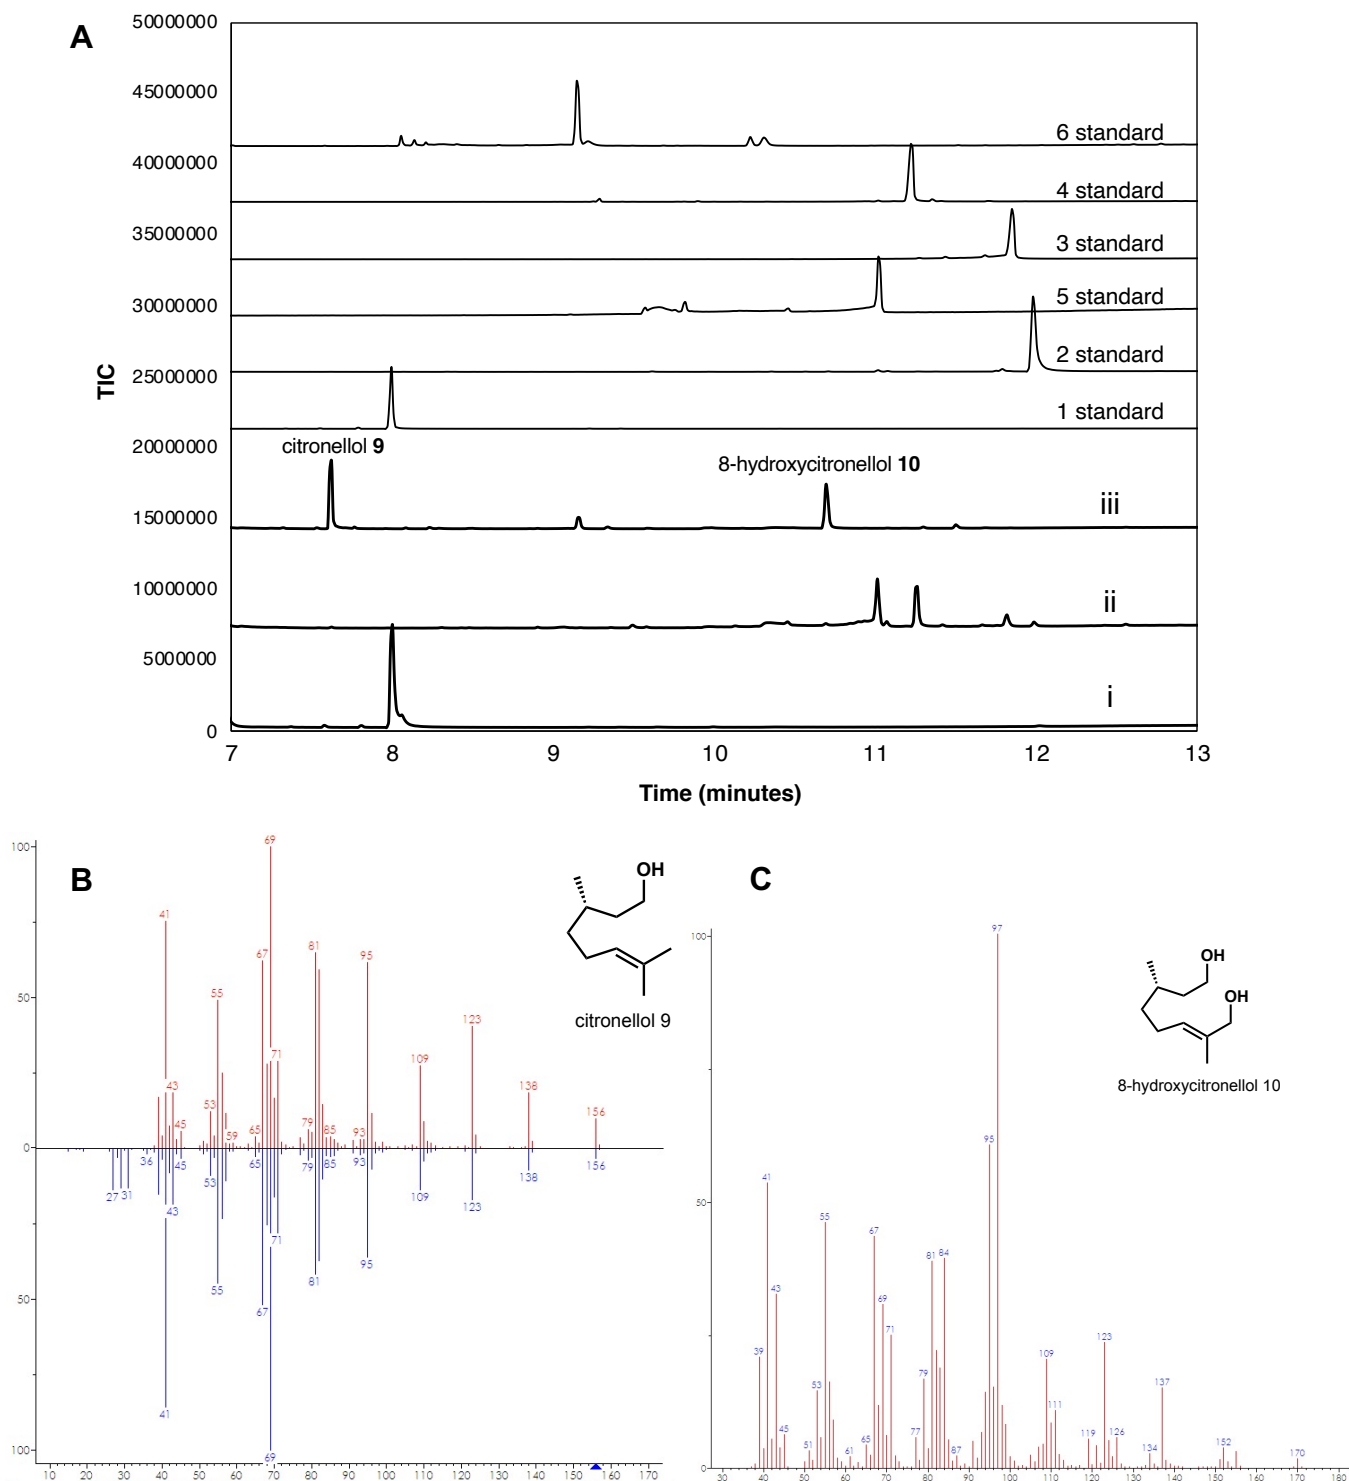



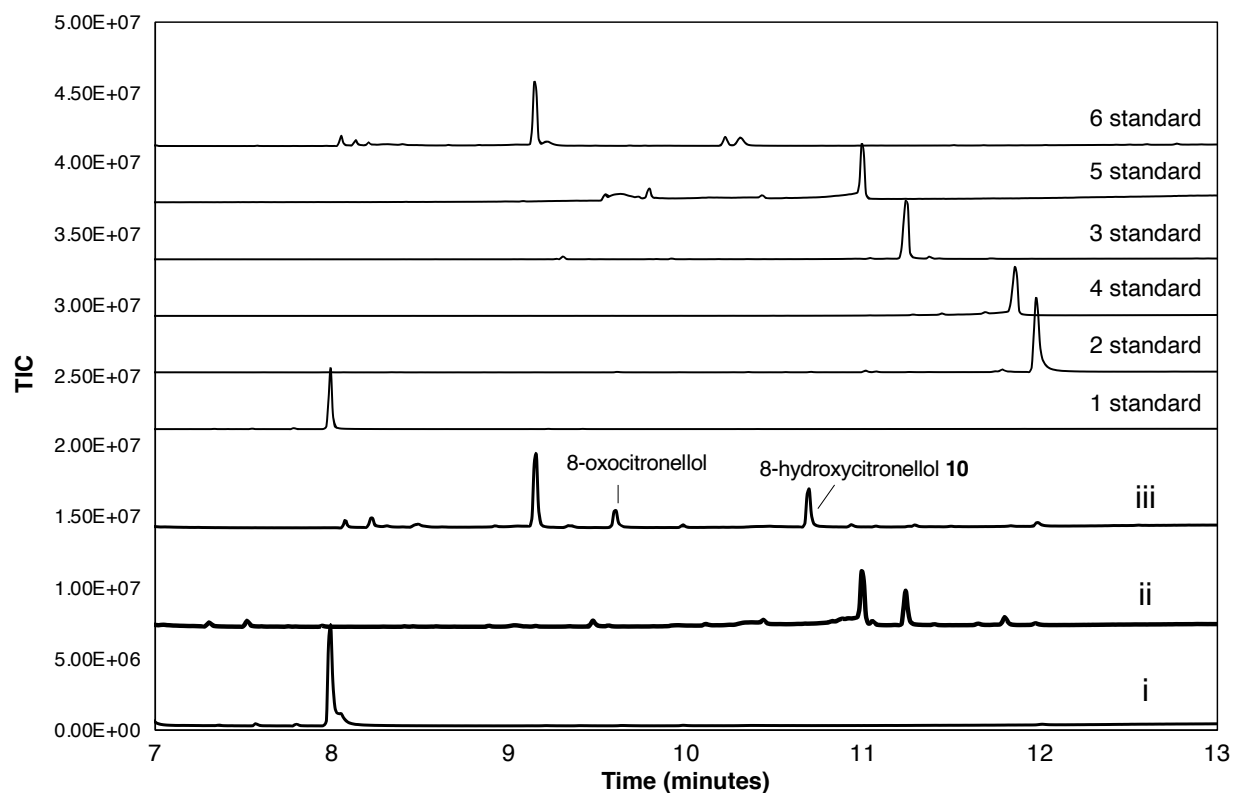

**Figure S14.** Small-scale one-pot two-step geraniol to nepetalactol conversion. Each reaction contains 2 mM geraniol, 5  $\mu$ M TfG8H, 10  $\mu$ M FpR, 10  $\mu$ M YkuN, 10  $\mu$ M GOR, 0.5  $\mu$ M ISY, 5  $\mu$ M MLPL, 1  $\mu$ M FumC, 10  $\mu$ M MaeB, 100  $\mu$ M NADPH, 100  $\mu$ M NAD<sup>+</sup> and 6 mM fumarate in BTP buffer (pH 9.0) unless otherwise specified, i. 0 min, ii. no ISY, iii. ISY/MLPL added after 2 hours of TfG8H/FpR/YkuN and GOR reaction.

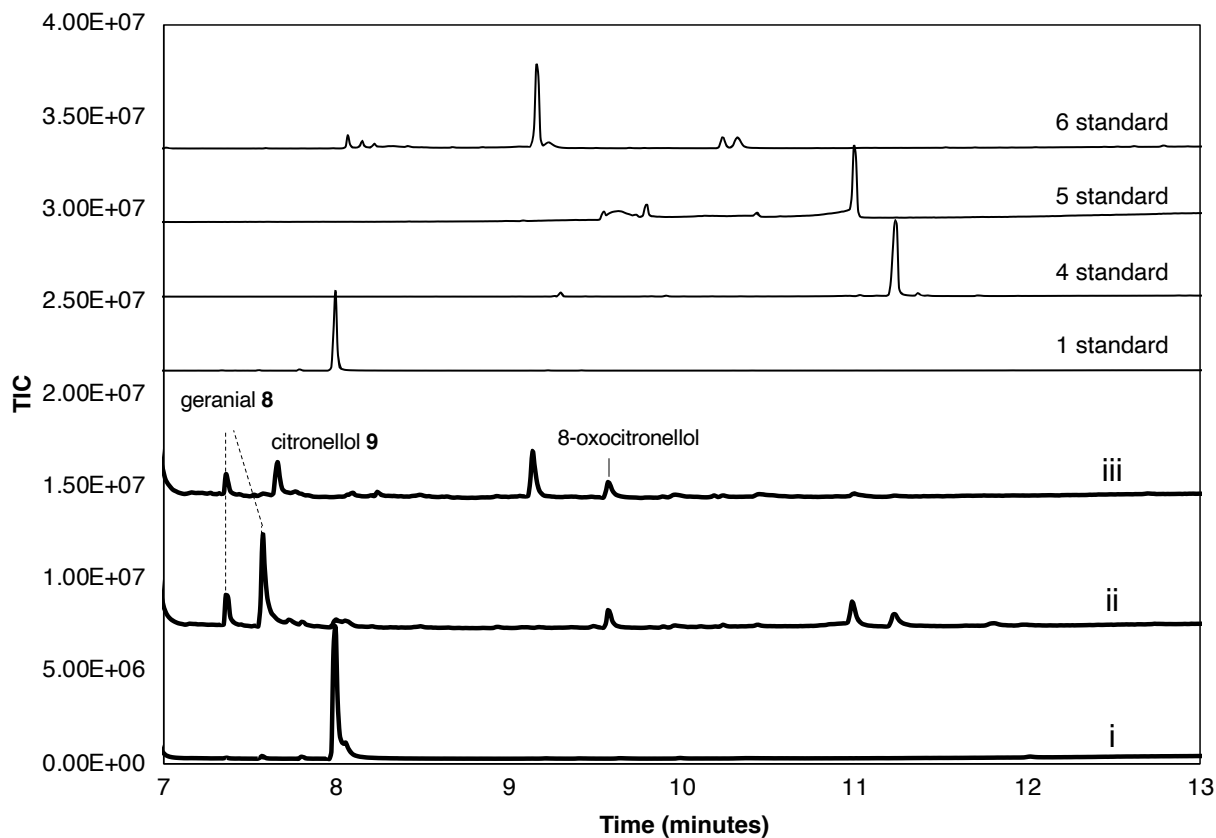

**Figure S15.** 10 mL-scale one-pot two-step geraniol to nepetalactol conversion. Each reaction contains 2 mM geraniol, 5  $\mu$ M TfG8H, 10  $\mu$ M FpR, 10  $\mu$ M YkuN, 10  $\mu$ M GOR, 0.5  $\mu$ M ISY, 5  $\mu$ M MLPL, 1  $\mu$ M FumC, 10  $\mu$ M MaeB, 100  $\mu$ M NADPH, 100  $\mu$ M NAD<sup>+</sup> and 6 mM fumarate in BTP buffer (pH 9.0) unless otherwise specified, i.0 min, ii. no ISY/MLPL, iii. ISY/MLPL added after 2 hours of TfG8H/FpR/YkuN and GOR reaction.

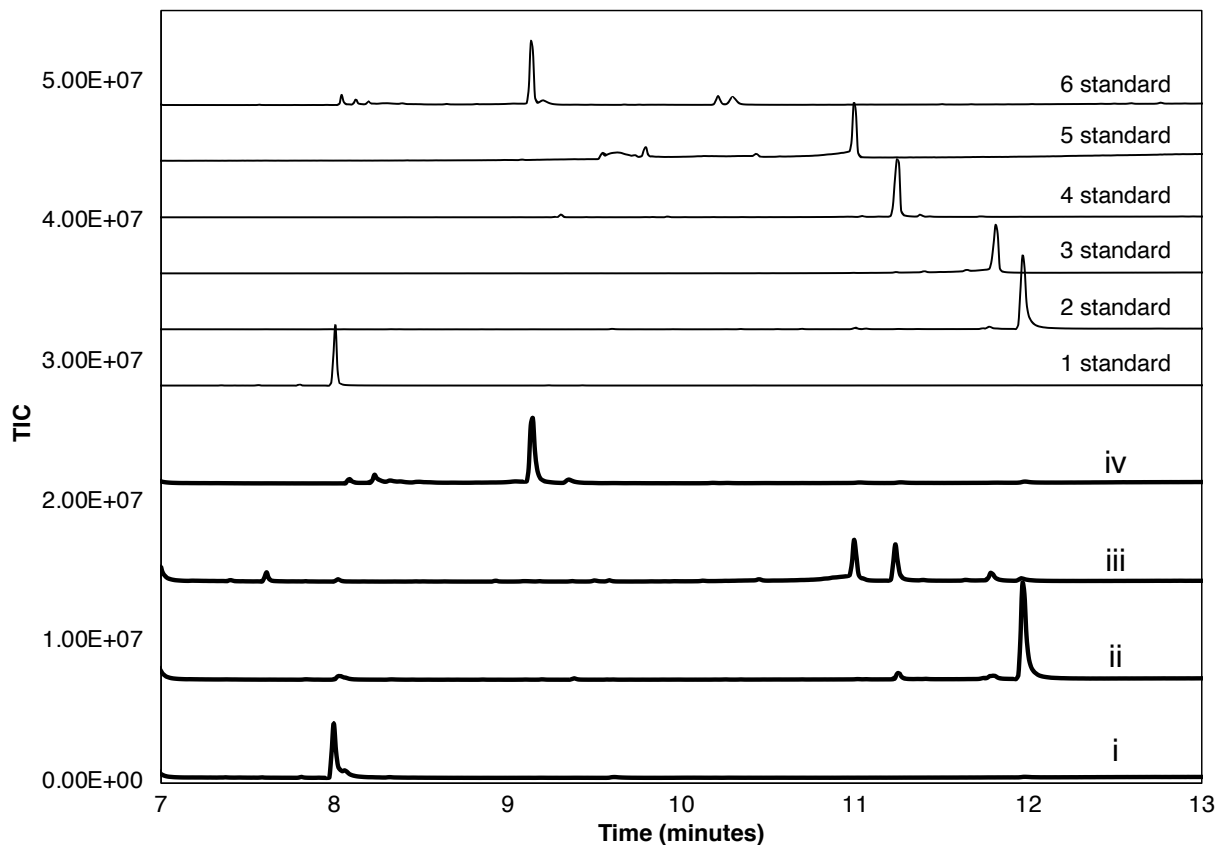

**Figure S16.** GC-MS chromatograms of 10 mL-scale one-pot drop-in geraniol to nepetalactol conversion. Reaction contains 2 mM geraniol, 5  $\mu$ M TfG8H, 10  $\mu$ M FpR, 10  $\mu$ M YkuN, 10  $\mu$ M GOR, 0.5  $\mu$ M ISY, 5  $\mu$ M MLPL, 1  $\mu$ M FumC, 10  $\mu$ M MaeB, 100  $\mu$ M NADPH, 100  $\mu$ M NAD<sup>+</sup> and 6 mM fumarate in BTP buffer (pH 9.0) unless otherwise specified, i. 0 min, ii. 2 hours reaction with TfG8H, iii. 2 hours reaction with GOR after TfG8H, iv. 2 hours reaction with ISY/MLPL after TfG8H and GOR.

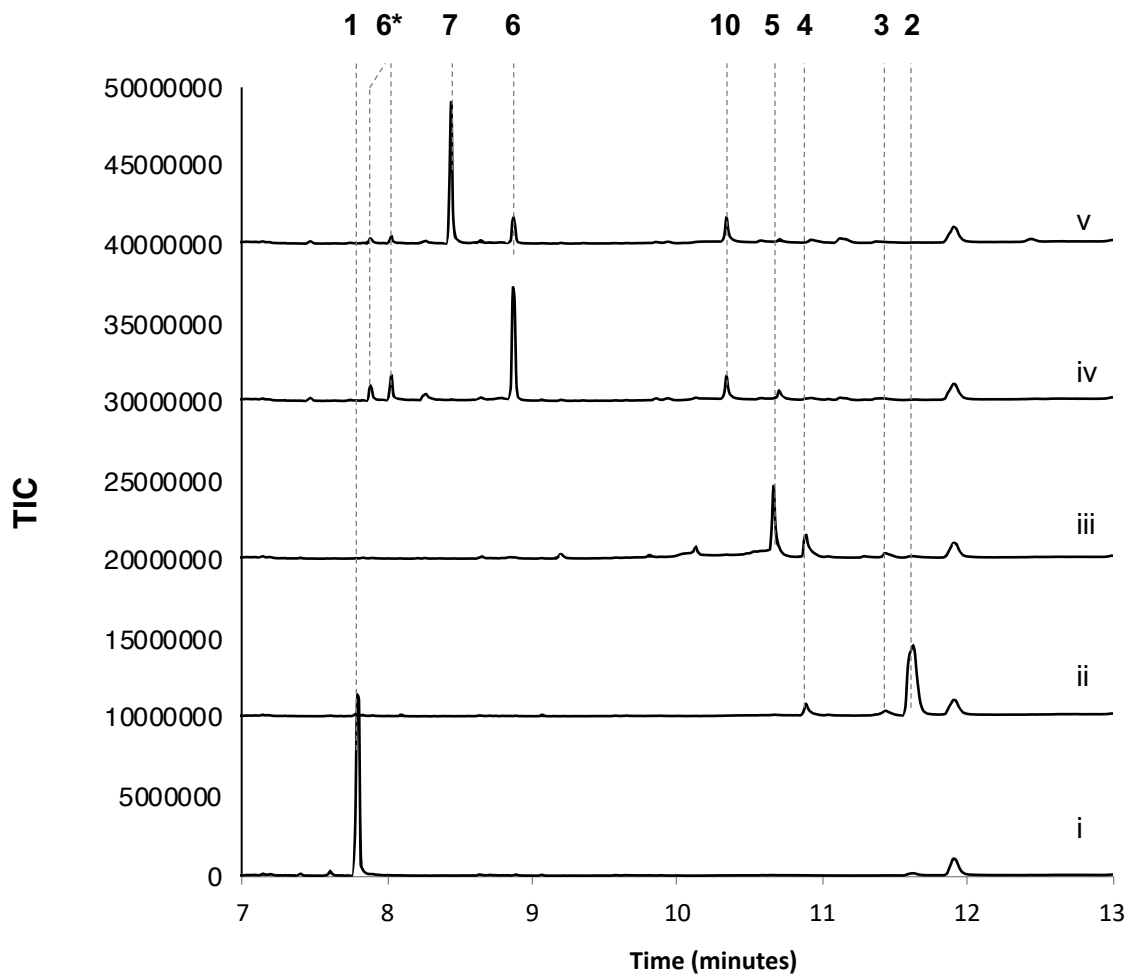

**Figure S17.** GC-MS chromatograms for 10 mL-scale one-pot conversion of 6.2 mM geraniol to nepetalactol and nepetalactone. Final reaction contained 957 mg/L geraniol **1**, 5  $\mu\text{M}$  TfG8H, 10  $\mu\text{M}$  FpR, 10  $\mu\text{M}$  YkuN, 10  $\mu\text{M}$  GOR, 0.5  $\mu\text{M}$  ISY, 5  $\mu\text{M}$  MLPL, 1  $\mu\text{M}$  FumC, 10  $\mu\text{M}$  MaeB, 100  $\mu\text{M}$  NADPH, 100  $\mu\text{M}$   $\text{NAD}^+$  and 18 mM fumarate in BTP buffer (pH 9.0) unless otherwise specified. (i) starting material, 6 mM **1**, (ii) 3-hour reaction with TfG8H, (iii) 2-hour reaction after GOR was added to (ii), (iv) 2-hour reaction after ISY/MLPL were added to (iii), (v) 2-hour reaction after ISY/MLPL and NEPS1 were added to (iii).

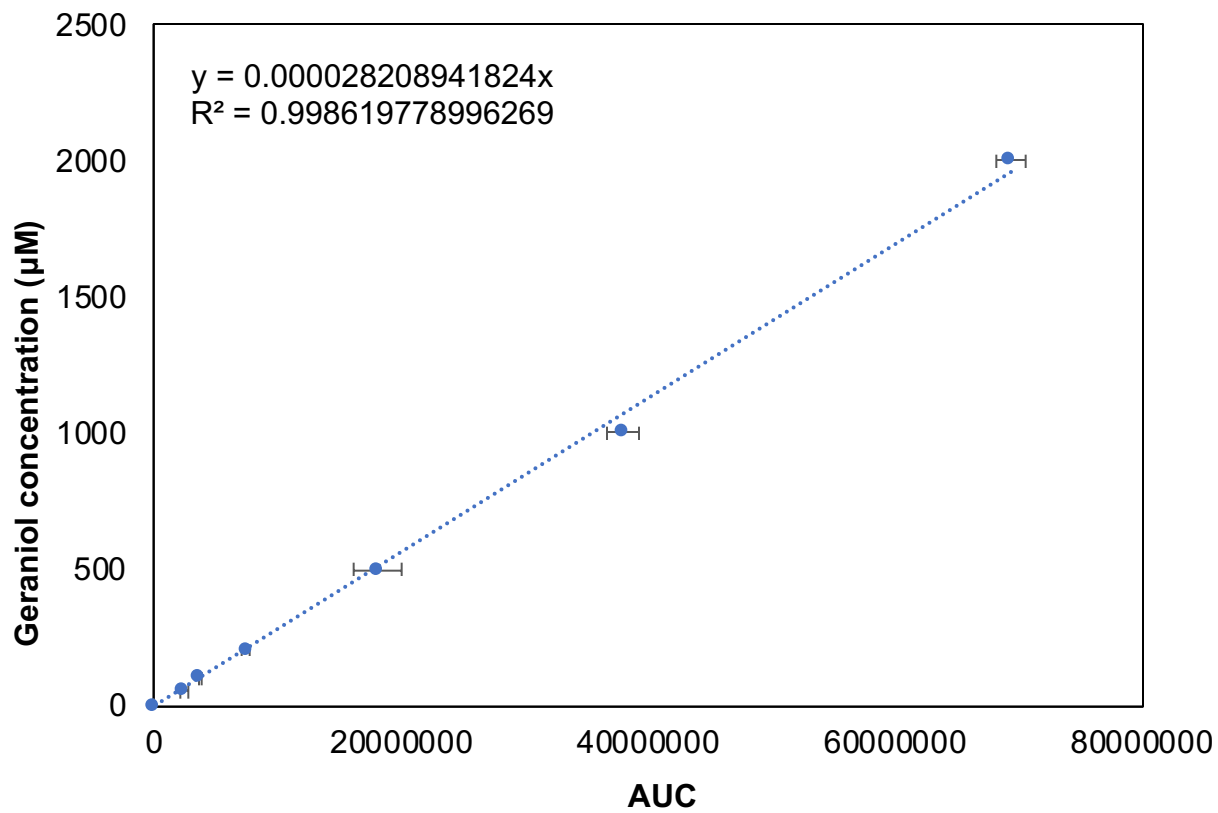

**Figure S18.** Geraniol calibration curve.

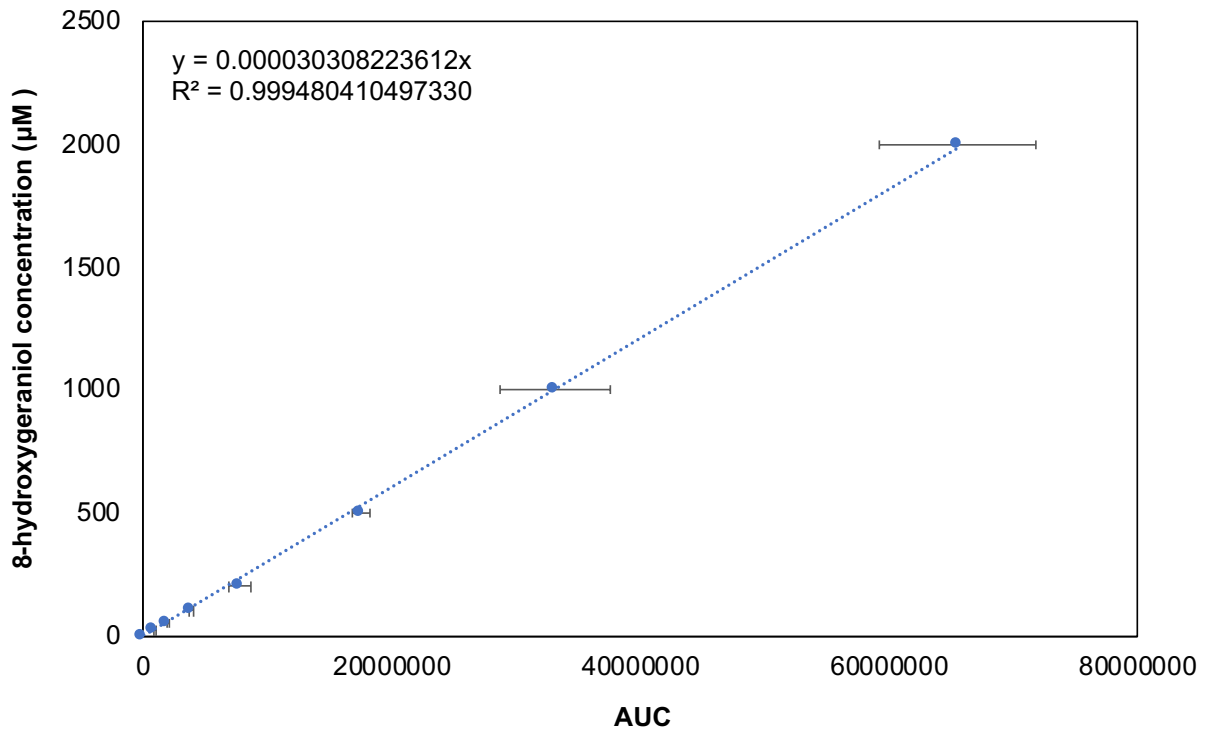

Figure S19. 8-hydroxygeraniol calibration curve.

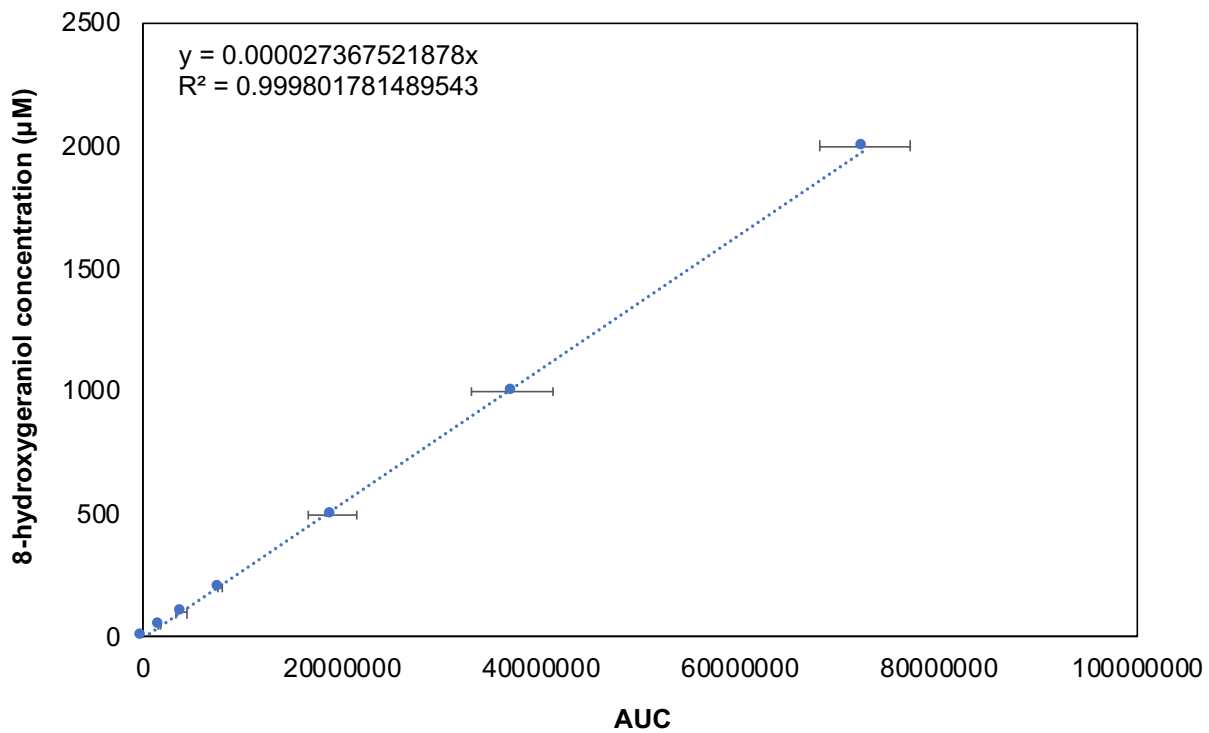

**Figure S20.** 8-oxogeraniol calibration curve.

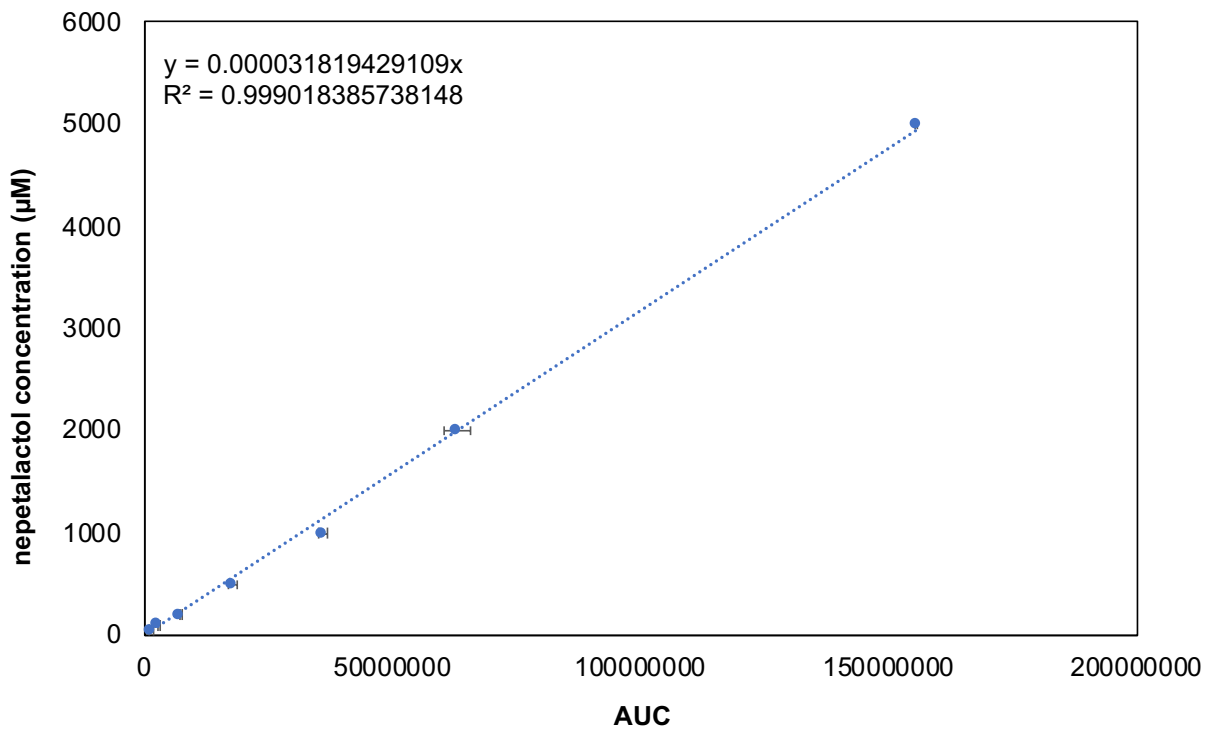

Figure S21. Nepetalactol calibration curve.



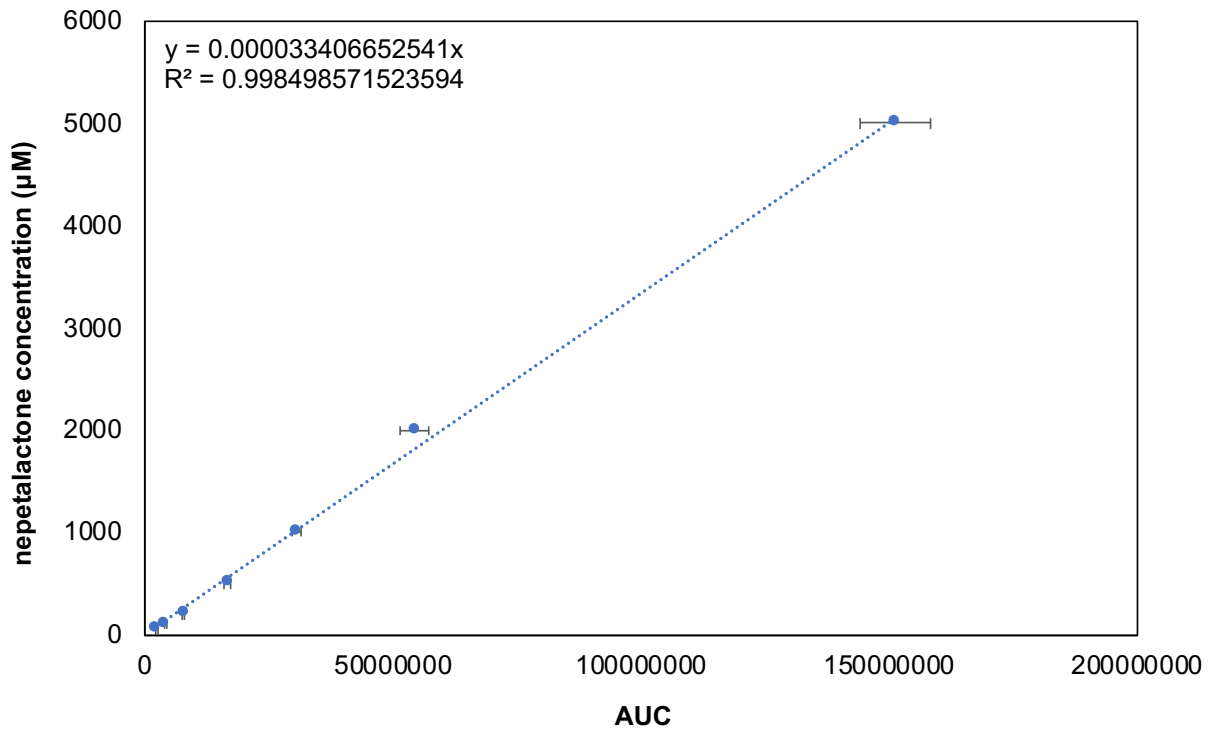

**Figure S22.** Nepetalactone calibration curve.

## References

- (1) Billingsley, J. M.; DeNicola, A. B.; Barber, J. S.; Tang, M.-C.; Horecka, J.; Chu, A.; Garg, N. K.; Tang, Y. Engineering the Biocatalytic Selectivity of Iridoid Production in *Saccharomyces Cerevisiae*. *Metab. Eng.* **44**, 117–125 (2017).
- (2) Ippoliti, F. M.; Barber, J. S.; Tang, Y.; Garg, N. K. Synthesis of 8-Hydroxygeraniol. *J. Org. Chem.* **83**, 11323–11326 (2018).
- (3) Dawson, G. W.; Pickett, J. A.; Smiley, D. W. M. The Aphid Sex Pheromone Cyclopentanoids: Synthesis in the Elucidation of Structure and Biosynthetic Pathways. *Bioorg. Med. Chem.* **4**, 351–361 (1996).
